1                    **Biological Sciences: Evolution; Ecology; Medical Science**

2                    **Sex and Power: sexual dimorphism in trait variability and its eco-**  
3                    **evolutionary and statistical implications**

4                    **Zajitschek, S.R.K.<sup>1,2\*</sup>, Zajitschek, F.<sup>1</sup>, Bonduriansky, R.<sup>1</sup>, Brooks, R.C.<sup>1</sup>, Cornwell, W.<sup>1</sup>, Falster,**  
5                    **D.S.<sup>1</sup>, Lagisz, M.<sup>1</sup>, Mason, J.<sup>3</sup>, Senior, A. M.<sup>4</sup>, Noble, D. A. W.<sup>1,5#</sup>, S. Nakagawa<sup>1\*#</sup>**

6                    <sup>1</sup> Evolution & Ecology Research Center, School of Biological, Earth, and Environmental  
7                    Sciences, University of New South Wales, Sydney, 2052, NSW, Australia.

8                    <sup>2</sup> Liverpool John Moores University, School of Biological and Environmental Sciences, James  
9                    Parsons Building, 3 Byrom Way, Liverpool L3 3 AF, UK.

10                    <sup>3</sup> European Bioinformatics Institute (EMBL-EBI), European Molecular Biology Laboratory,  
11                    Wellcome Trust Genome Campus, Hinxton, Cambridge CB10 1SD, UK.

12                    <sup>4</sup> University of Sydney, Charles Perkins Centre, School of Life and Environmental Sciences,  
13                    School of Mathematics and Statistics, Sydney, 2006, NSW, Australia.

14                    <sup>5</sup> Research School of Biology, Australian National University, Canberra, 2601, ACT, Australia.

15                    # equal contributions as senior authors.

16                    \*corresponding authors:

17                    S.Z. ([susi.zajitschek@gmail.com](mailto:susi.zajitschek@gmail.com)) and S.N. ([s.nakagawa@unsw.edu.au](mailto:s.nakagawa@unsw.edu.au))

18                    **ORCID IDs:**

19                    SZ 0000-0003-4676-9950; FZ 0000-0001-6010-6112; RB 0000-0002-5786-6951; RCB 0000-  
20                    0001-6926-0781; WC 0000-0003-4080-4073, DSF 0000-0002-9814-092X, ML 0000-0002-  
21                    3993-6127; JM 0000-0002-2796-5123; AS 0000-0001-9805-7280; DN 0000-0001-9460-8743;  
22                    SN 0000-0002-7765-5182

23 **ABSTRACT**

24 Biomedical and clinical sciences are experiencing a renewed interest in the fact that males  
25 and females differ in many anatomic, physiological, and behavioral traits. Sex differences in  
26 trait variability, however, are yet to receive similar recognition. In medical science,  
27 mammalian females are assumed to have higher trait variability due to estrus cycles (the  
28 ‘estrus-mediated variability hypothesis’); historically in biomedical research, females have  
29 been excluded for this reason. Contrastingly, evolutionary theory and associated data support  
30 the ‘greater male variability hypothesis’. Here, we test these competing hypotheses in 218  
31 traits measured in >27,000 mice, using meta-analysis methods. Neither hypothesis could  
32 universally explain patterns in trait variability. Sex-bias in variability was trait-dependent.  
33 While greater male variability was found in morphological traits, females were much more  
34 variable in immunological traits. Sex-specific variability has eco-evolutionary ramifications  
35 including sex-dependent responses to climate change, as well as statistical implications  
36 including power analysis considering sex difference in variance.

37

## 38 **Significance Statement**

39 Males and females differ in many traits. However, we know relatively little about sex  
40 differences in trait variability. In many clinical contexts, female subjects have traditionally  
41 been excluded, due to assumed higher variability caused by the estrus cycle. Contrastingly,  
42 theory from evolutionary biology predicts higher variability in males. Neither explanation  
43 universally fits the data, but specific trait groups exhibit strong sex-specific differences. Sex  
44 differences in trait variability implies, for example, that the two sexes respond differently to  
45 environmental changes, and one sex could fair worse than the other depending on the nature  
46 of changes. Also, such sex differences mean that we should regularly include both males and  
47 females in biomedical trials, carrying out statistical power calculations separately for both  
48 sexes.

## 49 **Keywords**

50 Sex inequality, gender difference, sexual selection, meta-regression, power analysis

## 51 INTRODUCTION

52 Sex differences arise because selection acts on the two sexes differently, especially on traits  
53 associated with mating and reproduction (1). Therefore, sex differences are widespread, a  
54 fact which is unsurprising to any evolutionary biologist. However, scientists in (bio-)medical  
55 fields have not traditionally regarded sex as a biological factor of intrinsic interest (2–7).  
56 Therefore, many (bio-)medical studies have been conducted only with male subjects, or  
57 without distinguishing between the sexes. Consequently, our knowledge is biased. For  
58 example, we know far more about drug efficacy in male compared to female subjects,  
59 contributing to unequal understanding of how the sexes respond to medical intervention (8).  
60 Only recently have (bio-)medical scientists started considering sex differences in their  
61 research (9–15). The National Institutes of Health (NIH) have implemented new guidelines for  
62 vertebrate animal and human research study designs, requiring that sex be included as a  
63 biological variable (2, 16, 17). This is an important step, but we can go much further.

64 [Figure 1 here]

65 When comparing the sexes, biologists generally focus on mean differences in trait values,  
66 placing little or no emphasis on sex differences in trait variability (see Fig. 1 for a diagram  
67 explaining differences in means and variances). Despite this, two hypotheses exist that  
68 explain why trait variability might be expected to differ between the sexes. Interestingly,  
69 these two hypotheses make opposing predictions.

70 First, the “estrus-mediated variability hypothesis” (Fig. 2), which emerged in the (bio-)  
71 medical research field, assumes that the female estrus cycle (see for example 6, 18) causes  
72 higher variability across traits in female subjects. This assumption is the major reason for why  
73 female research subjects were often excluded from biomedical research trials, especially in  
74 the neurosciences, physiology and pharmacology (18). Female exclusion was based on the  
75 grounds that including/using females in empirical research led to a loss of statistical power,  
76 or that animals must be sampled across the estrus cycle for one to make valid conclusions,  
77 requiring more time and resources.

78 Second, the “greater male variability hypothesis” suggests males exhibit higher trait variability  
79 because either: 1) they are subject to stronger sexual selection (19–21) or 2) because they are  
80 often the heterogametic sex (22) or both. In mammals, such as mice and humans, we expect  
81 males to have higher trait variability under either mechanism. This hypothesis has so far  
82 gained some support in the evolutionary and psychological literature (23, 24).

83 [Figure 2 here]

84 Here we conduct the first comprehensive test of the greater male variability and estrus-  
85 mediated variability hypotheses in mice (Fig. 2; cf. 24–28), examining sex differences in  
86 variance across 218 traits in 27,147 animals. To this end, we carry out a series of meta-

87 analyses in two steps (SI Appendix Fig. S1.1). First, we quantify the natural logarithm of the  
88 male to female coefficients of variation, CV (lnCVR) for each cohort (population) of mice, for  
89 different traits, along with the variability ratio of male to female standard deviations, SD, on  
90 the log scale (lnVR, following 29, see Fig. 1). Then, we analyze these effect sizes to quantify  
91 sex bias in variance for each trait using meta-analytic methods. To better understand our  
92 results and compare them to previously reported sex differences in trait means (4), we also  
93 quantify and analyze the log response ratio (lnRR). Then, we statistically amalgamate the trait-  
94 level results to test our hypotheses and to quantify the degree of sex biases in and across nine  
95 functional trait groups (for details on the grouping, see below). Our meta-analytic approach  
96 allows easy interpretation and comparison with earlier and future studies.

## 97 **RESULTS**

### 98 **Data characteristics and workflow**

99 We used a dataset compiled by the International Mouse Phenotyping Consortium (31) (IMPC,  
100 dataset acquired 6/2018). To gain insight into systematic sex differences, we only included  
101 data of wildtype-strain adult mice, between 100 and 500 days of age. We removed cases with  
102 missing data, and selected measurements that were closest to 100 days of age (young adult)  
103 when multiple measurements of the same trait were available. To obtain robust estimates of  
104 sex differences, we only used data on traits that were measured in at least two different  
105 institutions (see workflow diagram, SI Appendix Fig. S1.1 A).

106 Our data set comprised 218 continuous traits (after initial data cleaning and pre-processing;  
107 SI Appendix Fig. S1.1 A-D). It contains information from 27,147 mice from 9 wildtype strains  
108 that were studied across 11 institutions. We combined mouse strain/institution information  
109 to create a biological grouping variable (referred to as “population” in SI Appendix Fig. S1.1  
110 B; see also Table S6.1 for details), and the mean and variance of a trait for each population  
111 was quantified. We assigned traits according to related procedures into functionally and/or  
112 procedurally related trait groups to enhance interpretability (referred to as “functional  
113 groups” hereafter; see also SI Appendix Fig. S1.1 G). Our nine functional trait groups were  
114 behaviour, morphology, metabolism, physiology, immunology, hematology, heart, hearing  
115 and eye (for the rationale of these functional groups and related details, see Methods and SI  
116 Appendix Table S6.3).

117 [Figure 3 here]

### 118 **Testing the two hypotheses**

119 We found that some means and variabilities of traits were biased towards males (i.e. ‘male-  
120 biased’, hereafter; “turquoise” shaded traits, Fig. 3), but others towards females (i.e. ‘female-  
121 biased’, hereafter; “orange” shading, Fig. 3) within all functional groups. These sex-specific  
122 biases occur in mean trait sizes and also in our measures of trait variability. There were strong  
123 positive relationships between mean and variance across traits ( $r > 0.94$  on the log scale; SI

124 Appendix Fig. S2.1), and therefore, we report the results of InCVR, which controls for  
125 differences in means, in the main text. Results on InVR are presented in the electronic  
126 supplementary material (SI Appendix Fig. S5.1 and S5.2).

127 There was no consistent pattern in which sex has more variability (InCVR) in the here  
128 examined traits (left panel in Fig. 3A). Our meta-analytic results also did not support a  
129 consistent pattern of either higher male variability or higher female variability (see Fig. 3B,  
130 left panel: “All” indicates that across all traits and functional groups, there was no significant  
131 sex bias in variances; InCVR = 0.005, 95% confidence interval, 95% CI = [-0.009 to 0.018]).  
132 However, there was high heterogeneity among traits ( $I^2 = 76.5\%$ , SI Appendix Table S6.4; see  
133 also SI Appendix Table S6.5), indicating sex differences in variability are trait-dependent,  
134 corroborating our general observation that variability in some traits was male-based but  
135 others female-biased (Fig. 3A).

136 As expected, specific functional trait groups showed significant sex-specific bias in variability  
137 (Fig. 3B). The variability among-traits within a functional group was lower than that of all the  
138 traits combined (SI Appendix Table S6.4). For example, males exhibited an 8.05% increase in  
139 CV relative to females for morphological traits (InCVR = 0.077; CI = [0.041 to 0.113],  $I^2 = 67.3\%$ ),  
140 but CV was female-biased for immunological traits (6.59% higher in females, InCVR = -0.068,  
141 CI = [-0.098 to 0.038],  $I^2 = 40.8\%$ ) and eye morphology (7.85% higher in females, InCVR = -  
142 0.081, CI = [-0.147 to (-0.016)],  $I^2 = 49.8\%$ ).

143 The pattern was similar for overall sexual dimorphism in mean trait values (here, a slight male  
144 bias is indicated by larger “turquoise” than “orange” areas; Fig. 3A, right and Fig. 3B, InRR:  
145 “All”, InRR = 0.012, CI = [-0.006 to 0.31]). Trait means (InRR) were 7% larger for males (InRR =  
146 0.067; CI = [0.007 to 0.128]) in morphological traits and 15.3 % larger in males for metabolic  
147 traits (InRR = 0.142; CI = [0.036 to 0.248]). In contrast, females had 5.59 % [InRR = 0.057, CI =  
148 [-0.107 to (-0.007)] larger means than those of males for immunological traits. We note that  
149 these meta-analytic estimates were accompanied by very large between-trait heterogeneity  
150 values (morphology  $I^2 = 99.7\%$ , metabolism  $I^2 = 99.4\%$ , immunology  $I^2 = 96.2$ ; see SI Appendix  
151 Table S6.4), indicating that even within the same functional groups, the degree and direction  
152 of sex-bias in the mean was not consistent among traits.

153 [Figure 4 here]

154

## 155 **DISCUSSION**

156 We tested competing predictions from the two hypotheses for why sex-biases in trait  
157 variability exist. Neither the ‘greater male variability’ hypothesis nor the ‘estrus-mediated  
158 variability’ hypothesis explain the observed patterns in sex-biased trait variation on their own.  
159 Therefore, our results add further empirical weight to calls that question the basis for the  
160 routine exclusion of one sex in biomedical research based on the estrus-mediated variability  
161 hypothesis (3, 5–7).

### 162 **Greater male variability vs. estrus-mediated variability?**

163 Evolutionary biologists commonly expect greater variability in the heterogametic sex than the  
164 homogametic sex. In mammals, males are heterogametic, and hence are expected to exhibit  
165 higher trait variability compared to females, which is also consistent with an expectation from  
166 the theory of sexual selection (24). Our results provide only partial support for the greater  
167 male variability hypothesis because the expected pattern only manifested for morphological  
168 traits (see Fig. 3 & 4). This result corroborates a previous analysis across animals, which found  
169 that the heterogametic sex was more variable in body size (24). However, our data do not  
170 support the conclusion that higher variability in males occurs across all traits including within  
171 the class of morphological traits).

172 [Figure 4]

173 The estrus-mediated variability hypothesis was, at least until recently (6, 12), regularly used  
174 as a rationale for including only male subjects in many biomedical studies. So far, we know  
175 very little about the relationship between hormonal fluctuations and general trait variability  
176 within and among female subjects. Our results are consistent with the estrus-mediated  
177 variability hypothesis for immunological traits only. Immune responses can strongly depend  
178 on sex hormones (32, 33), which may explain higher female variability in these traits.  
179 However, if estrus status affects traits through variation in hormone levels, we would expect  
180 to also find higher female variability in physiological and hematological traits. This was not  
181 the case in our dataset. Interestingly, however, eye morphology (structural traits, which  
182 should fluctuate little across the estrus cycle) also appeared to be more variable in females  
183 than males, but little is known about sex differences in ocular traits in general (34, 35). Overall,  
184 we find no consistent support for the female estrus-mediated variability hypothesis.

185 In line with our findings, recent studies have refuted the prediction of higher female variability  
186 (6, 12, 18, 28, 29). For example, several rodent studies have found that males are more  
187 variable than females (6, 12, 28, 29, 36, 37). Further studies should investigate whether higher  
188 female variability in immunological traits is indeed due to the estrus cycle, or generally  
189 because of greater between-individual variation (cf. Fig. 2).

190 In general, we found many traits to be sexually dimorphic (Fig. 4), in accordance with previous  
191 studies (4). More specifically, males are larger than females, while females have higher

192 immunological parameters (see Fig. 4). Notably, most sexually dimorphic trait means also  
193 show the greatest differences in trait variance (Fig. 3 & Fig. 4). Indeed, theory predicts that  
194 sexually selected traits (e.g., larger body size for males due to male-male competition) are  
195 likely more variable, as these traits are often condition dependent (38). This relationship may  
196 explain why male-biased morphological traits are larger and more variable.

### 197 **Eco-evolutionary implications**

198 We have used InCVR values to compare phenotypic variability (CV) between the sexes. When  
199 InCVR is used for fitness-related traits, it can signify sex differences in the 'opportunity for  
200 selection' between females and males (38). If we assume that phenotypic variation (i.e.  
201 variability in traits) has a heritable basis, then large ratios of InCVR may indicate differences  
202 in the evolutionary potential of each sex to respond to selection, at least in the short term  
203 (41). We note, however, that in our study, InCVR reflects sex difference in trait variability  
204 within strains, so that the observed variability differences are mainly due to phenotypic  
205 plasticity.

206 Sex-specific differences could lead to sex-skewed populations if fitness-related traits exhibit  
207 strong sex-bias in variability. For example, disease outbreaks or the ability to deal with  
208 changing temperatures could affect one sex more severely than the other. Changes in sex-  
209 ratios, in turn, can influence mating systems (42, 43) with potential downstream effects  
210 on population dynamics. In addition, sex-specific variation and differences in evolutionary  
211 potential may also have important implications for modelling population dynamics, where  
212 such sex-specific differences are not normally taken into account. Explicitly modelling sex  
213 difference in trait variability could lead to different conclusions compared to existing models  
214 (cf. 44).

### 215 **Statistical and practical implications**

216 It is now mandatory to include both sexes in biomedical experiments and clinical trials funded  
217 by the NIH, unless there exists strong justification against the inclusion of both sexes (45). In  
218 order to conduct meaningful research and make sound clinical recommendations for both  
219 male and female patients, it is necessary to understand not only how trait means, but also  
220 how trait variances differ between the sexes. If one sex is systematically more variable in a  
221 trait of interest than the other, then experiments should be designed to accommodate  
222 relative differences in statistical power between the sexes (which has not been considered  
223 before, see 3, 5–7). For example, given a limited number of animal subjects in an experiment  
224 measuring immunological traits, a balanced sex ratio may not be optimal. Female  
225 immunological traits are generally more variable (i.e. higher CV and SD). If we assume that  
226 responses to an experimental treatment will be similar between the sexes for this functional  
227 trait group, we will require more females to achieve the same statistical power as for the  
228 males.



229 To help researchers adjust their sex-specific sample size to achieve optimal statistical power,  
230 we provide a tool (ShinyApp; <https://bit.ly/sex-difference/>). This tool may serve as a starting  
231 point for checking baseline variability for each sex in mice. The sex bias (indicated by the %  
232 difference between the sexes) is provided for separate traits, procedures, and functional  
233 groups. These meta-analytic results are based on our analyses of more than 2 million rodent  
234 data points, from 27,147 individual mice. We note that, however, variability in a trait  
235 measured in untreated individuals maintained under carefully standardized environmental  
236 conditions, as reported here, may not directly translate into the same variability when  
237 measured in experimentally treated individuals, or individuals exposed to a range of  
238 environments (i.e. natural populations or human cohorts).

239 Relevantly, when two groups (e.g., males and females) show difference in variability, we  
240 violate an important statistical assumption, the homogeneity of variance or  
241 homoscedasticity. Such violation is detrimental (i.e., leading to a higher Type I error rate),  
242 especially when the two groups have different sample sizes, for which we advocate above.  
243 Therefore, we should consider incorporating heteroscedasticity (different variances) explicitly  
244 or using robust estimators of variance (also known as ‘the sandwich variance estimator’) to  
245 prevent a higher Type I error rate (46).

## 246 **Conclusion**

247 We have shown that sex biases in variability occur in many mouse traits but that the direction  
248 of those biases differs between traits. Neither the ‘greater male variability’ nor the ‘estrus-  
249 mediated variability’ hypothesis provides a general explanation for sex-differences in trait  
250 variability. Instead, we have found that the direction of the sex bias varies across traits and  
251 among trait types (Fig. 3 & 4). Our findings have important ecological and evolutionary  
252 ramifications. If the differences in variability correspond to the potential of each sex to  
253 respond to changes in specific environments, this sex difference needs to be incorporated  
254 into demographic and population-genetic modelling. Moreover, in the (bio-)medical field, our  
255 results should inform decisions during study design by providing more rigorous power  
256 analyses that allow researchers to incorporate sex-specific differences for sample size. We  
257 believe that taking sex-differences in trait variability into account will help avoid misleading  
258 conclusions and provide new insights into sex differences across many areas of biological and  
259 bio-medical research. Ultimately, such considerations will not only better our knowledge, but  
260 also close the current gaps in our biased knowledge (47).

## 261 **METHODS**

### 262 *Data selection and process*

263 The IMPC (International Mouse Phenotyping Consortium) provides a comprehensive  
264 catalogue of mammalian gene function for investigating the genetics of health and disease,  
265 by systematically collecting phenotypes of knock-out and wild type mice. To investigate

266 differences in trait variability between the sexes, we only considered the data for wild-type  
267 control mice. We retrieved the dataset from the IMPC server in June 2018 and filtered it to  
268 contain non-categorical traits for wildtype mice. The initial dataset comprised over 2,500,000  
269 data points for 340 traits. In cases where multiple measurements were taken over time, data  
270 cleaning started with selecting single measurements for each individual and trait. In these  
271 cases, we selected the measurement closest to “100 days of age”. We excluded data for  
272 juvenile and unsexed mice (SI Appendix Fig. S1.1 A; this data set and scripts can be found on  
273 <https://bit.ly/code-mice-sex-diff>; raw data: <https://doi.org/10.5281/zenodo.3759701>).

#### 274 ***Grouping and effect size calculation***

275 We created a grouping variable called “population” (SI Appendix Fig. S1.1 B). A population  
276 comprised a group of individuals belonging to a distinct wild-type strain maintained at one  
277 particular location (institution); populations were identified for every trait of interest. Our  
278 data were derived from 11 different locations/institutions, and a given location/institution  
279 could provide data on multiple populations (see SI Appendix Table S6.1 for details on numbers  
280 of strains and Institutions). We included only populations that contained data points for at  
281 least 6 individuals, and which had information for members of both sexes; further, these  
282 populations for a particular trait had to come from at least two institutions to be eligible for  
283 inclusion. After this selection process, the dataset contained 2,300,000 data points across 232  
284 traits.

285 We used the function *escalc* in the R package, *metafor* (48) to obtain  $\ln\text{CVR}$ ,  $\ln\text{VR}$  and  $\ln\text{RR}$   
286 and their corresponding sampling variance for each trait for each population; we worked in  
287 the R environment for data cleaning, processing and analyses (R Core Team 2017 (49); version  
288 3.6.0; for the versions of all the software packages used for this article and all the details and  
289 code for the statistical analyses, see the electronic supplements).

#### 290 ***Meta-analyses: overview***

291 We conducted meta-analyses at two different levels (SI Appendix Fig. S1.1 C-J). First, we  
292 conducted a meta-analysis for each trait for all three effect size types ( $\ln\text{RR}$ ,  $\ln\text{VR}$  and  $\ln\text{CVR}$ ),  
293 calculated at the ‘population’ level (i.e. using population as a unit of analysis). Second, we  
294 statistically amalgamated overall effect sizes estimated at each trait (i.e. overall trait means  
295 as a unit of analysis) after accounting for dependence among traits. In other words, we  
296 conducted second-order meta-analyses (50). We used the second-order meta-analyses for  
297 three different purposes: A) estimating overall sex biases in variance ( $\ln\text{CVR}$  and  $\ln\text{VR}$ ) and  
298 mean ( $\ln\text{RR}$ ) in the nine functional groups (for details, see below) and in all these groups  
299 combined (the overall estimates); B) visualizing heterogeneities across populations for the  
300 three types of effect size in the nine functional trait groups, which complemented the first set  
301 of analyses (SI Appendix Fig. S1.1 I, Table S6.6); and C) when traits were found to be  
302 significantly sex-biased, grouping such traits into either male-biased and female-biased traits,  
303 and then, estimating overall magnitudes of sex bias for both sexes again for the nine

304 functional trait groups. Only the first second-order meta-analysis (A) directly related to the  
305 testing of our hypotheses, we report the method detail and the results of B and C in SI  
306 Appendix.

### 307 ***Meta-analyses: population as an analysis unit***

308 To obtain degree of sex bias for each trait mean and variance (SI Appendix Fig. S1.1 C), we  
309 used the function *rma.mv* in the R package *metafor* (48) by fitting the following multilevel  
310 meta-analytic model (sensu 51):

$$311 \text{ES}_i \sim 1 + (1 | \text{Strain}_j) + (1 | \text{Location}_k) + (1 | \text{Unit}_i) + \text{Error}_i,$$

312 where ‘ES<sub>*i*</sub>’ is the *i*th effect size (i.e. lnCVR, lnVR and lnRR) for each of 232 traits, the ‘1’ is the  
313 overall intercept (other ‘1’s are random intercepts for the following random effects), ‘Strain<sub>*j*</sub>’  
314 is a random effect for the *j*th strain of mice (among 9 strains), ‘Location<sub>*k*</sub>’ is a random effect  
315 for the *k*th location (among 11 institutions), ‘Unit<sub>*i*</sub>’ is a residual (or effect-size level or  
316 ‘population-level’ random effect) for the *i*th effect size, ‘Error<sub>*i*</sub>’ is a random effect of the  
317 known sampling error for the *i*th effect size. Given the model above, meta-analytic results had  
318 two components: 1) overall means with standard errors (95% confidence intervals), and 2)  
319 total heterogeneity (the sum of the three variance components, which is estimated for the  
320 random effects).

321 We excluded traits which did not carry useful information for this study (i.e. fixed traits, such  
322 as number of vertebrae, digits, ribs and other traits that were not variable across wildtype  
323 mice; note that this may be different for knock-down mutant strains) or where the meta-  
324 analytic model for the trait of interest did not converge, most likely due to small sample size  
325 from the dataset (14 traits, see SI Appendix, for details: Meta-analyses; 1. Population as  
326 analysis unit). We therefore obtained a dataset containing meta-analytic results for 218 traits  
327 at this stage, to use for our second-order meta-analyses (SI Appendix Fig. S1.1 D).

### 328 ***Meta-analyses: accounting for correlated traits***

329 Our dataset of meta-analytic results included a large number of non-independent traits. To  
330 account for dependence, we identified 90 out of 218 traits, and organized them into 19 trait  
331 sub-groups (containing 2-10 correlated traits, see SI Appendix Fig. S1.1 E). For example, many  
332 measurements (i.e. traits) from hematological and immunological assays were hierarchically  
333 clustered or overlapped with each other (e.g., cell type A, B and A+B). We combined the meta-  
334 analytic results from 90 traits into 19 meta-analytic results (Fig. 3F) using the function *robu* in  
335 the R package, *robumeta* with the assumption of sampling errors being correlated with the  
336 default value of  $r = 0.8$  (52). Consequently, our final dataset for secondary meta-analyses  
337 contained 147 traits (i.e. the newly condensed 19 plus the remaining 128 independent traits,  
338 see SI Appendix Fig 1.1 , Table S6.2), which we assume to be independent of each other.

### 339 ***Second-order meta-analyses: trait as an analysis unit***

340 We created our nine overarching *functional groups* (SI Appendix Fig. S1.1 G) by condensing  
341 the IMPC's 26 procedural categories into related clusters (see SI Appendix Table S6.3 for  
342 details on clustering of traits, procedures and grouping terms).

343 To test our two hypotheses about how trait variability changes in relation to sex, we  
344 estimated overall effect sizes for nine functional groups by aggregating meta-analytic results  
345 via a 'classical' random-effect models using the function *rma.uni* in the R package *metafor*  
346 (48). In other words, we conducted three sets of 10 second-order meta-analyses (i.e. meta-  
347 analyzing 3 types of effect size: lnRR, lnVR and lnCVR for 9 functional groups and one for all  
348 the groups combined, SI Appendix Fig. S1.1 H).

## 349 Author contributions

350 SN conceived the initial idea, and all contributed to furthering the idea and the design of the  
351 study. SRKZ, along with FZ, led the analyses and writing with inputs from all authors. DWAN  
352 created the Shiny application. Apart from SRKZ, FZ, DWAN and SN, all authors have  
353 contributed equally, yet uniquely, and are listed in alphabetical order.

354 SRKZ, ML and SN were all supported by the Australian (ARC) Discovery Grant (DP180100818).  
355 JM was supported by EMBL core funding and the NIH Common Fund (UM1-H G006370). AMS was  
356 supported by an ARC fellowship (DE180101520).

## 357 REFERENCES

- 358 1. C. Darwin, *The Descent of Man, and Selection in Relation to Sex* (John Murray, 1871).
- 359 2. J. A. Clayton, Studying both sexes: a guiding principle for biomedicine. *FASEB J.* **30**, 519–  
360 524 (2015).
- 361 3. K. L. Flanagan, Sexual dimorphism in biomedical research: a call to analyse by sex. *Trans*  
362 *R Soc Trop Med Hyg* **108**, 385–7 (2014).
- 363 4. N. A. Karp, *et al.*, Prevalence of sexual dimorphism in mammalian phenotypic traits. *Nat.*  
364 *Commun.* **8**, 15475 (2017).
- 365 5. S. L. Klein, *et al.*, Opinion: Sex inclusion in basic research drives discovery. *Proc. Natl. Acad.*  
366 *Sci.* **112**, 5257–5258 (2015).
- 367 6. B. J. Prendergast, K. G. Onishi, I. Zucker, Female mice liberated for inclusion in  
368 neuroscience and biomedical research. *Neurosci Biobehav Rev* **40**, 1–5 (2014).
- 369 7. R. M. Shansky, C. S. Woolley, Considering sex as a biological variable will be valuable for  
370 neuroscience research. *J. Neurosci.* **36**, 11817–11822 (2016).
- 371 8. A. Nowogrodzki, Inequality in medicine. *Nature* **550**, S18–S19 (2017).
- 372 9. D. M. Dorris, J. Y. Cao, J. A. Willett, C. A. Hauser, J. Meitzen, Intrinsic excitability varies by  
373 sex in prepubertal striatal medium spiny neurons. *J. Neurophysiol.* **113**, 720–729 (2015).
- 374 10. C. Ingvorsen, N. A. Karp, C. J. Lelliott, The role of sex and body weight on the metabolic  
375 effects of high-fat diet in C57BL/6N mice. *Nutr. Amp Diabetes* **7**, e261 (2017).
- 376 11. C. M. Robinson, Y. Wang, J. K. Pfeiffer, Sex-dependent intestinal replication of an enteric  
377 virus. *J. Virol.* **91** (2017).
- 378 12. B. L. Smarr, A. D. Grant, I. Zucker, B. J. Prendergast, L. J. Kriegsfeld, Sex differences in  
379 variability across timescales in BALB/c mice. *Biol. Sex Differ.* **8** (2017).

- 380 13. A. A. Ahmad, M. D. Randall, R. E. Roberts, Sex differences in the role of phospholipase A2-  
381 dependent arachidonic acid pathway in the perivascular adipose tissue function in pigs. *J.*  
382 *Physiol.* **595**, 6623–6634 (2017).
- 383 14. R. W. Foltin, S. M. Evans, Sex differences in the anorexigenic effects of dexfenfluramine  
384 and amphetamine in baboons. *Exp. Clin. Psychopharmacol.* **26**, 335–340 (2018).
- 385 15. L. P. Thompson, L. Chen, B. M. Polster, G. Pinkas, H. Song, Prenatal hypoxia impairs cardiac  
386 mitochondrial and ventricular function in guinea pig offspring in a sex-related manner.  
387 *Am. J. Physiol. Regul. Integr. Comp. Physiol.* **315**, R1232–R1241 (2018).
- 388 16. J. A. Clayton, F. S. Collins, Policy: NIH to balance sex in cell and animal studies. *Nature* **509**,  
389 282–3 (2014).
- 390 17. NIH, Enhancing reproducibility through rigor and transparency. **Notice NOT-OD-15-103**  
391 (2015).
- 392 18. A. K. Beery, I. Zucker, Sex bias in neuroscience and biomedical research. *Neurosci.*  
393 *Biobehav. Rev.* **35**, 565–572 (2011).
- 394 19. A. Pomiankowski, A. P. Moller, A resolution of the lek paradox. *Proc. R. Soc. London Series*  
395 *B-Biol. Sci.* **260**, 21–29 (1995).
- 396 20. Z.-B. Zeng, Long-term correlated response, interpopulation covariation, and interspecific  
397 allometry. *Evolution* **42**, 363–374 (1988).
- 398 21. J. Archer, M. Mehdikhani, Variability among males in sexually selected attributes. *Rev.*  
399 *Gen. Psychol.* **7**, 219–236 (2003).
- 400 22. J. W. James, Covariances between relatives due to sex-linked genes. *Biometrics* **29**, 584–  
401 8 (1973).
- 402 23. A.-C. Lehre, K. P. Lehre, P. Laake, N. C. Danbolt, Greater intrasex phenotype variability in  
403 males than in females is a fundamental aspect of the gender differences in humans. *Dev.*  
404 *Psychobiol.* **51**, 198–206 (2009).
- 405 24. K. Reinhold, L. Engqvist, The variability is in the sex chromosomes. *Evolution* **67**, 3662–8  
406 (2013).
- 407 25. W. Johnson, A. Carothers, I. J. Deary, Sex differences in variability in general intelligence:  
408 a new look at the old question. *Perspect. Psychol. Sci.* **3**, 518–531 (2008).
- 409 26. L. V. Hedges, A. Nowell, Sex differences in mental test scores, variability, and numbers of  
410 high-scoring individuals. *Science* **269**, 41–45 (1995).
- 411 27. Y. Itoh, A. P. Arnold, Are females more variable than males in gene expression? Meta-  
412 analysis of microarray datasets. *Biol. Sex Differ.* **6** (2015).
- 413 28. J. B. Becker, B. J. Prendergast, J. W. Liang, Female rats are not more variable than male  
414 rats: a meta-analysis of neuroscience studies. *Biol. Sex Differ.* **7**, 34 (2016).

- 415 29. A. K. Beery, Inclusion of females does not increase variability in rodent research studies.  
416 *Curr. Opin. Behav. Sci.* **23**, 143–149 (2018).
- 417 30. S. Nakagawa, *et al.*, Meta-analysis of variation: ecological and evolutionary applications  
418 and beyond. *Methods Ecol. Evol.* **6**, 143–152 (2015).
- 419 31. M. E. Dickinson, *et al.*, High-throughput discovery of novel developmental phenotypes.  
420 *Nature* **537**, 508 (2016).
- 421 32. M. Zuk, K. A. McKean, Sex differences in parasite infections: Patterns and processes. *Int.*  
422 *J. Parasitol.* **26**, 1009–1024 (1996).
- 423 33. C. Grossman, Possible underlying mechanisms of sexual dimorphism in the immune  
424 response, fact and hypothesis. *J. Steroid Biochem.* **34**, 241–251 (1989).
- 425 34. H. Wagner, B. A. Fink, K. Zadnik, Sex- and gender-based differences in healthy and  
426 diseased eyes. *Optom. - J. Am. Optom. Assoc.* **79**, 636–652 (2008).
- 427 35. A. Shaqiri, *et al.*, Sex-related differences in vision are heterogeneous. *Sci. Rep.* **8** (2018).
- 428 36. A. Fritz, I. Amrein, D. P. Wolfer, Similar reliability and equivalent performance of female  
429 and male mice in the open field and water-maze place navigation task. *Am. J. Med. Genet.*  
430 *C Semin. Med. Genet.* **175**, 380–391 (2017).
- 431 37. J. S. Mogil, M. L. Chanda, The case for the inclusion of female subjects in basic science  
432 studies of pain. *Pain* **117**, 1–5 (2005).
- 433 38. L. Rowe, D. Houle, The lek paradox and the capture of genetic variance by condition  
434 dependent traits. *Proc. R. Soc. Lond. B Biol. Sci.* **263**, 1415–1421 (1996).
- 435 39. T. Janicke, E. H. Morrow, Operational sex ratio predicts the opportunity and direction of  
436 sexual selection across animals. *Ecol. Lett.* **21**, 384–391 (2018).
- 437 40. T. Janicke, I. K. Häderer, M. J. Lajeunesse, N. Anthes, Darwinian sex roles confirmed across  
438 the animal kingdom. *Sci. Adv.* **2**, e1500983 (2016).
- 439 41. T. F. Hansen, D. Houle, Measuring and comparing evolvability and constraint in  
440 multivariate characters. *J. Evol. Biol.* **21**, 1201–1219 (2008).
- 441 42. H. Kokko, M. D. Jennions, Parental investment, sexual selection and sex ratios. *J. Evol. Biol.*  
442 **21**, 919–948 (2008).
- 443 43. T. Székely, F. J. Weissing, J. Komdeur, Adult sex ratio variation: implications for breeding  
444 system evolution. *J. Evol. Biol.* **27**, 1500–1512 (2014).
- 445 44. F. Colchero, A. E. Aliaga, O. R. Jones, D. A. Conde, Individual heterogeneity determines sex  
446 differences in mortality in a monogamous bird with reversed sexual dimorphism. *J. Anim.*  
447 *Ecol.* **86**, 899–907 (2017).

- 448 45. NIH, Consideration of sex as a biological variable in NIH-funded research. **Notice NOT-OD-**  
449 **15-102** (2015).
- 450 46. I. R. Cleasby, S. Nakagawa, Neglected biological patterns in the residuals. *Behav. Ecol.*  
451 *Sociobiol.* **65**, 2361–2372 (2011).
- 452 47. C. Tannenbaum, R. P. Ellis, F. Eyssel, J. Zou, L. Schiebinger, Sex and gender analysis  
453 improves science and engineering. *Nature* **575**, 137–146 (2019).
- 454 48. W. Viechtbauer, Conducting meta-analyses in R with the metafor package. *J Stat Softw* **36**  
455 (2010).
- 456 49. R Core Team, *R: A language and environment for statistical computing*. (2017).
- 457 50. S. Nakagawa, *et al.*, Research weaving: visualizing the future of research synthesis. *Trends*  
458 *Ecol. Evol.* **34**, 224–238 (2019).
- 459 51. S. Nakagawa, E. S. Santos, Methodological issues and advances in biological meta-  
460 analysis. *Evol. Ecol.* **26**, 1253–1274 (2012).
- 461 52. Z. Fisher, E. Tipton, robumeta: An R-package for robust variance estimation in meta-  
462 analysis. *ArXiv Prepr. ArXiv150302220* (2015).
- 463
- 464
- 465



466 **Fig. 1.**

467 Overview of meta-analytic methods used to detect differences in means and variances in any  
 468 given trait (e.g., body size in mice). The orange shaded mice represent females (F), turquoise  
 469 shaded mice stand for males (M). The solid “dot” represents a mean trait value within the  
 470 respective group. Solid lines represent standard deviation, with upper and lower bounds  
 471 indicated by diamond shapes. Below, we present three types of effect sizes that can be used  
 472 for comparing two groups, along with the respective formulas and interpretations. Compared  
 473 to InVR, InCVR provides a more general measure of the difference in variability between two  
 474 groups (mean-adjusted variability ratio).

475  
 476

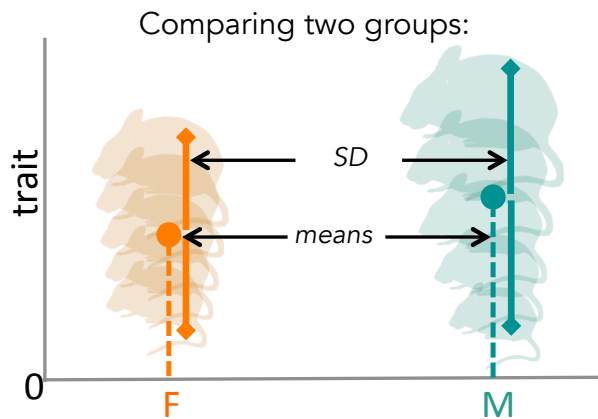

Which group has larger mean value?

Response Ratio:

$$InRR = \ln\left(\frac{\text{---} \bullet \text{---}}{\text{---} \bullet \text{---}}\right)$$

$InRR > 0 \rightarrow$  male-biased mean trait values

Which group is more variable?

Variability Ratio:

$$InVR = \ln\left(\frac{\text{---} \blacklozenge \text{---}}{\text{---} \blacklozenge \text{---}}\right)$$

$InVR > 0 \rightarrow$  traits more variable in males

Which group is more variable when controlling for the means?

Coefficient of Variation Ratio:

$$InCVR = \ln\left(\frac{\text{---} \bullet \text{---} \blacklozenge \text{---}}{\text{---} \bullet \text{---} \blacklozenge \text{---}}\right)$$

$InCVR > 0 \rightarrow$  male-biased mean trait values

477 **Fig. 2.**

478 The two hypotheses (“Greater Male Variability” vs “Estrus Mediated variability”) have  
479 different underlying predictions on how variabilities influence total observed phenotypic  
480 variance ( $V_{total}$  in the figure). For Greater Male Variability, the within-subject [or within-trait]  
481 variation  $V_{within}$  could be potentially negligible or is equal in males and females. This is  
482 illustrated as the shaded distributions around each individual mean (dashed vertical lines),  
483 which are of equal area for the males (turquoise) and females (orange). The greater value of  
484  $V_{total}$  is driven by wider distribution of mean trait values in males compared to females (i.e.  
485  $V_{between}$ , represented by a thick horizontal bar). The estrus-mediated variability hypothesis, in  
486 contrast, assumes that within-subject [or within trait] variability is much higher in females  
487 than in males (broader orange-shaded trait distributions than blue-green distributions), while  
488 the variability of the means between individuals stays the same (thick horizontal bars).

489

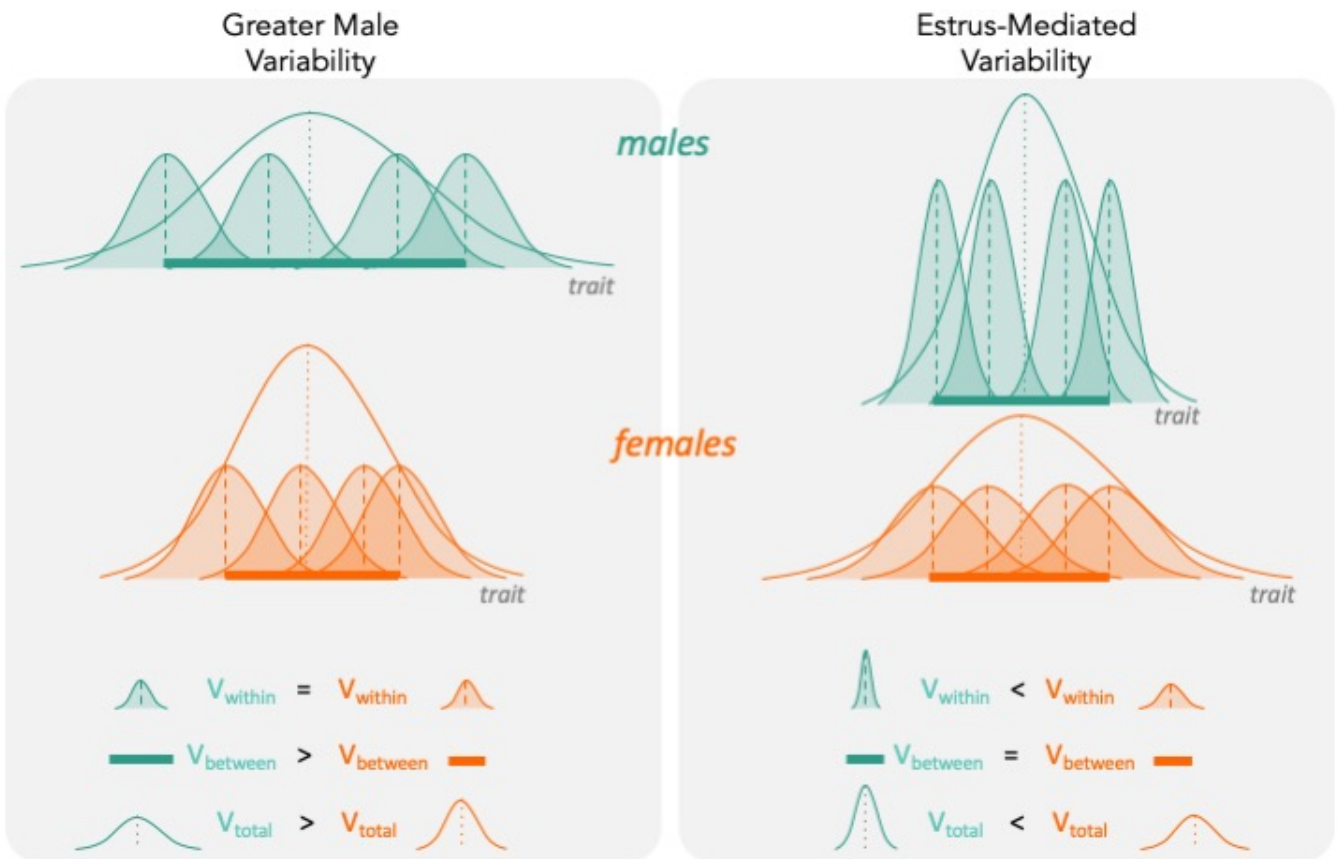

490

491

492 **Fig. 3:**

493 Panel A shows the numbers of traits across functional groups that are either male-biased  
 494 (turquoise) or female-biased (orange; as in SI Appendix Fig. S1.1 D). The x-axes in Panel A  
 495 show the overall percentages of traits, coloured shading is indicative of direction of sex-bias  
 496 sex (if meta-analytic means < 0, then they are female-based whereas if they are > 0, male-  
 497 based). White numbers in the turquoise bars represent numbers of traits that show male-bias  
 498 within a given group of traits, number in the orange area the number of female-biased traits.  
 499 Panel B shows effect sizes and 95% CI from separate meta-analysis for each functional group  
 500 (SI Appendix Fig. S1.1 H). Traits that are male biased in Panel B are shifted towards the  
 501 righthand side of the zero-midline (near the turquoise male symbol), whereas female bias is  
 502 shifted towards the left (near orange symbol).

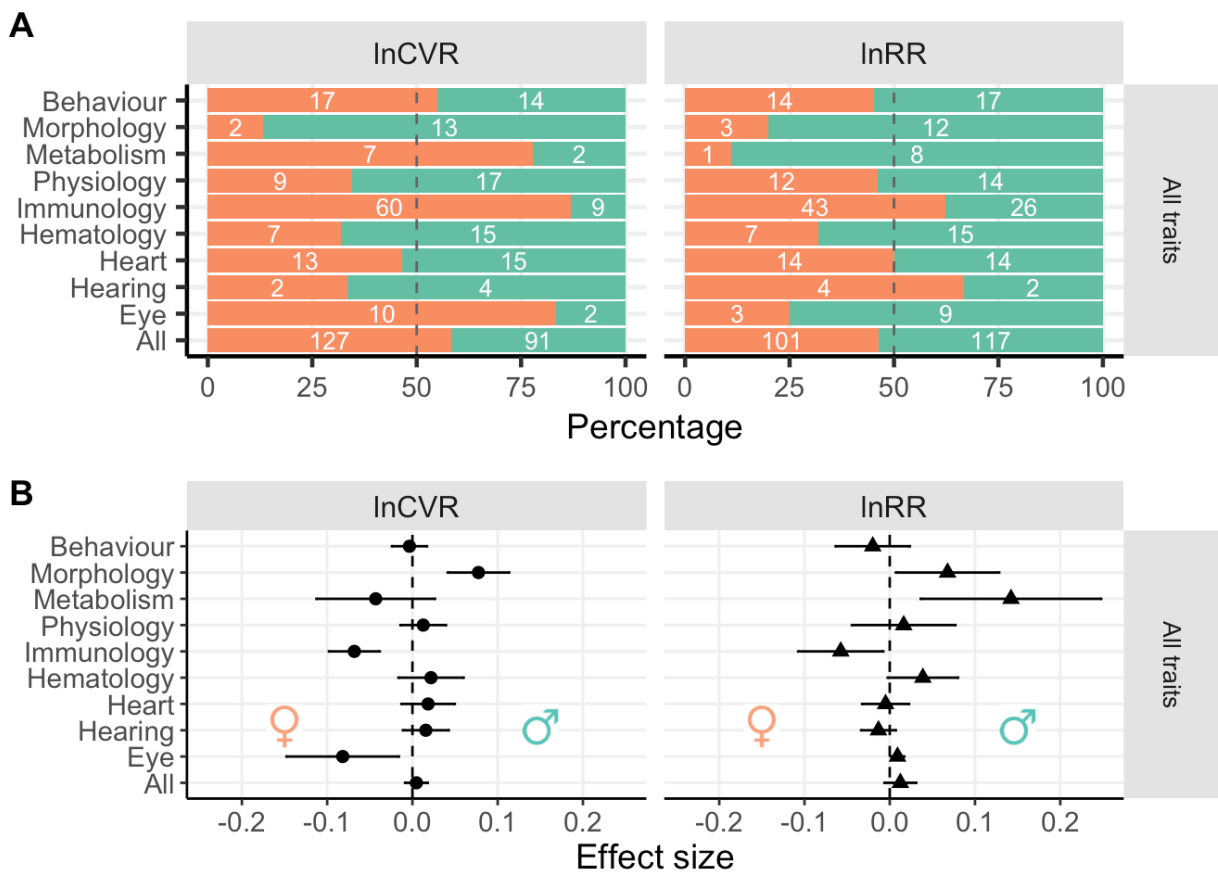

503

504 **Fig. 4.**

505 Summary of sex-differences in the mean trait values (InRR) and variances (InCVR) across ten  
506 functional trait groups.

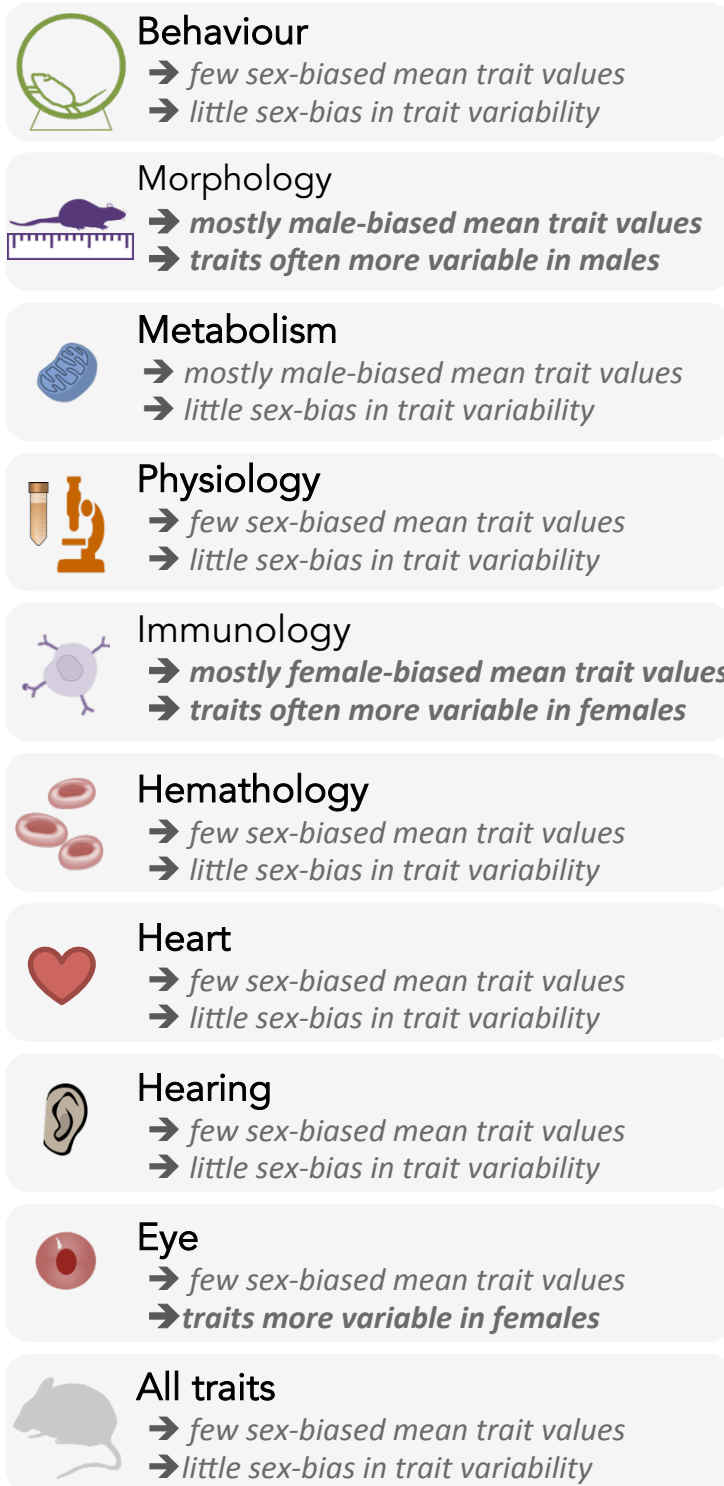

507
