## **Sex and Power: sexual dimorphism in trait variability and its evolutionary and statistical implications**

**Zajitschek, S.R.K.<sup>1,2\*</sup>, Zajitschek, F.<sup>1</sup>, Bonduriansky, R.<sup>1</sup>, Brooks, R.C.<sup>1</sup>, Cornwell, W.<sup>1</sup>, Falster, D.S.<sup>1</sup>, Lagisz, M.<sup>1</sup>, Mason, J.<sup>3</sup>, Senior, A. M.<sup>4</sup>, Noble, D. A. W.<sup>1,5#</sup>, S. Nakagawa<sup>1\*#</sup>**

<sup>1</sup> Evolution & Ecology Research Center, School of Biological, Earth, and Environmental Sciences, University of New South Wales, Sydney, 2052, NSW, Australia.

<sup>2</sup> Liverpool John Moores University, School of Biological and Environmental Sciences, James Parsons Building, 3 Byrom Way, Liverpool L3 3 AF, UK.

<sup>3</sup> European Bioinformatics Institute (EMBL-EBI), European Molecular Biology Laboratory, Wellcome Trust Genome Campus, Hinxton, Cambridge CB10 1SD, UK.

<sup>4</sup> University of Sydney, Charles Perkins Centre, School of Life and Environmental Sciences, School of Mathematics and Statistics, Sydney, 2006, NSW, Australia.

<sup>5</sup> Research School of Biology, Australian National University, Canberra, 2601, ACT, Australia.

# equal contributions as senior authors.

\*corresponding authors:

S.Z. ([susi.zajitschek@gmail.com](mailto:susi.zajitschek@gmail.com)) and S.N. ([s.nakagawa@unsw.edu.au](mailto:s.nakagawa@unsw.edu.au))

### **ORCID IDs:**

SZ 0000-0003-4676-9950; FZ 0000-0001-6010-6112; RB 0000-0002-5786-6951; RCB 0000-0001-6926-0781; WC 0000-0003-4080-4073, DSF 0000-0002-9814-092X, ML 0000-0002-3993-6127; JM 0000-0002-2796-5123; AS 0000-0001-9805-7280; DN 0000-0001-9460-8743; SN 0000-0002-7765-5182

1 **ABSTRACT**

2 Biomedical and clinical sciences are experiencing a renewed interest in the fact that males and  
3 females differ in many anatomic, physiological, and behavioral traits. Sex differences in trait  
4 variability, however, are yet to receive similar recognition. In medical science, mammalian  
5 females are assumed to have higher trait variability due to estrous cycles (the ‘estrus-mediated  
6 variability hypothesis’); historically in biomedical research, females have been excluded for this  
7 reason. Contrastingly, evolutionary theory and associated data support the ‘greater male  
8 variability hypothesis’. Here, we test these competing hypotheses in 218 traits measured in  
9 >26,900 mice, using meta-analysis methods. Neither hypothesis could universally explain  
10 patterns in trait variability. Sex-bias in variability was trait-dependent. While greater male  
11 variability was found in morphological traits, females were much more variable in  
12 immunological traits. Sex-specific variability has eco-evolutionary ramifications including sex-  
13 dependent responses to climate change, as well as statistical implications including power  
14 analysis considering sex difference in variance.

15 **Keywords**

16 Sex inequality, gender difference, sexual selection, meta-regression, power analysis

## 17 INTRODUCTION

18 Sex differences arise because selection acts on the two sexes differently, especially on traits  
19 associated with mating and reproduction (1). Therefore, sex differences are widespread, a fact  
20 which is unsurprising to any evolutionary biologist. However, scientists in many (bio-)medical  
21 fields have not necessarily regarded sex as a biological factor of intrinsic interest (2–7).  
22 Therefore, many (bio-)medical studies have only been conducted with male subjects.  
23 Consequently, our knowledge is biased. For example, we know far more about drug efficacy in  
24 male compared to female subjects, contributing to a poor understanding of how the sexes  
25 respond differently to medical interventions (8). This gap in knowledge is predicted to lead to  
26 overmedication and adverse drug reactions in women (9). Only recently have (bio-)medical  
27 scientists started considering sex differences in their research (10–16). Indeed, the National  
28 Institutes of Health (NIH) have now implemented new guidelines for animal and human  
29 research study designs, requiring that sex be included as a biological variable (2, 17, 18).

30 [Figure 1 here]

31 When comparing the sexes, biologists generally focus on mean differences in trait values,  
32 placing little or no emphasis on sex differences in trait variability (see Fig. 1 for a diagram  
33 explaining differences in means and variances). Despite this, two hypotheses exist that explain  
34 why trait variability might be expected to differ between the sexes. Interestingly, these two  
35 hypotheses make opposing predictions.

36 First, the “estrus-mediated variability hypothesis” (Fig. 2), which emerged in the (bio-)medical  
37 research field, assumes that the female estrous cycle (see for example 6, 19) causes higher  
38 variability across traits in female subjects. A wide range of labile traits are presumed to co-vary  
39 with physiological changes that are induced by reproductive hormones. High variability is,  
40 therefore, expected to be particularly prominent when the stage of the estrous cycle is  
41 unknown and unaccounted for. This higher trait variability, resulting from females being at  
42 different stages of their estrous cycle, is the main reason for why female research subjects are  
43 often excluded from biomedical research trials, especially in the neurosciences, physiology and  
44 pharmacology (18). Female exclusion has traditionally been justified based on the grounds that  
45 including females in empirical research leads to a loss of statistical power, or that animals must  
46 be sampled across the estrous cycle for one to make valid conclusions, requiring more time and  
47 resources.

48 Second, the “greater male variability hypothesis” suggests males exhibit higher trait variability  
49 because of two different mechanisms. The first mechanism is based on males being the  
50 heterogametic sex in mammals. Mammalian females possess two X chromosomes, leading to  
51 an ‘averaging’ of trait expression across the genes on each chromosome. In contrast, males  
52 exhibit greater variance because a single gene on the X chromosome is likely to lead to more  
53 extreme trait values (20). The second mechanism is based on males being under stronger sexual  
54 selection (21–23). Empirical evidence supports higher variability of traits that are sexually

55 selected, often harbouring high genetic variance and being condition-dependent, which makes  
56 sense as ‘condition’ as a trait is likely to be based on 1000s of loci (24, 25). Thus, higher genetic  
57 and, thus, phenotypic variance resulting from sexual selection is less general because it is only  
58 expected to apply to sexually selected traits. In mammals, it is likely that both mechanisms are  
59 operating concomitantly. So far, the “greater male variability hypothesis” has gained some  
60 support in the evolutionary and psychological literature (20, 26).

61 [Figure 2 here]

62 Here we conduct the first comprehensive test of the greater male variability and estrus-  
63 mediated variability hypotheses in mice (Fig. 2; cf. , 20, 27–31), examining sex differences in  
64 variance across 218 traits in 26,916 animals. To this end, we carry out a series of meta-analyses  
65 in two steps (SI Appendix Fig. S1.1). First, we quantify the natural logarithm of the male to  
66 female coefficients of variation, CV, or relative variance (lnCVR) for each cohort (population)  
67 of mice, for different traits, along with the variability ratio of male to female standard  
68 deviations, SD, on the log scale (lnVR, following 32, see Fig. 1). Then, we analyze these effect  
69 sizes to quantify sex bias in variance for each trait using meta-analytic methods. To better  
70 understand our results and match them to previously reported sex differences in trait means  
71 (4), we also quantify and analyze the log response ratio (lnRR). Then, we statistically  
72 amalgamate the trait-level results to test our hypotheses and to quantify the degree of sex  
73 biases in and across nine functional trait groups (for details on the grouping, see below). Our  
74 meta-analytic approach allows easy interpretation and comparison with earlier and future  
75 studies. Further, the proposed method using lnCVR (and lnVR) is probably the only practical  
76 method to compare variability between two sexes within and across studies (32, 33), as far as  
77 we are aware. Also, the use of a ratio (i.e. lnRR, lnVR, lnCVR) between two groups (males and  
78 females) naturally controls for different units (e.g., cm, g, ml) and also for changes in traits over  
79 time and space.

## 80 **RESULTS**

### 81 **Data characteristics and workflow**

82 We used a dataset compiled by the International Mouse Phenotyping Consortium (34) (IMPC,  
83 dataset acquired 6/2018). To gain insight into systematic sex differences, we only included data  
84 of wildtype-strain adult mice, between 100 and 500 days of age. We removed cases with  
85 missing data, and selected measurements that were closest to 100 days of age (young adult)  
86 when multiple measurements of the same trait were available. To obtain robust estimates of  
87 sex differences, we only used data on traits that were measured in at least two different  
88 institutions (see workflow diagram, SI Appendix Fig. S1.1 A).

89 Our data set comprised 218 continuous traits (after initial data cleaning and pre-processing; SI  
90 Appendix Fig. S1.1 A-D). It contains information from 26,916 mice from 9 wildtype strains that  
91 were studied across 11 institutions. We combined mouse strain/institution information to

92 create a biological grouping variable (referred to as “population” in SI Appendix Fig. S1.1 B; see  
93 also Table S6.1 for details), and the mean and variance of a trait for each population was  
94 quantified. We assigned traits according to related procedures into functionally and/or  
95 procedurally related trait groups to enhance interpretability (referred to as “functional groups”  
96 hereafter; see also SI Appendix Fig. S1.1 G). Our nine functional trait groups were behaviour,  
97 morphology, metabolism, physiology, immunology, hematology, heart, hearing and eye (for the  
98 rationale of these functional groups and related details, see Methods and SI Appendix Table  
99 S6.3).

100 [Figure 3 here]

### 101 **Testing the two hypotheses**

102 We found that some means and variabilities of traits were biased towards males (i.e. ‘male-  
103 biased’, hereafter; “turquoise” shaded traits, Fig. 3), but others towards females (i.e. ‘female-  
104 biased’, hereafter; “orange” shading, Fig. 3) within all functional groups. These sex-specific  
105 biases occur in mean trait sizes and also in our measures of trait variability. There were strong  
106 positive relationships between mean and variance across traits ( $r > 0.94$  on the log scale; SI  
107 Appendix Fig. S2.1), and therefore, we report the results of lnCVR, which controls for  
108 differences in means, in the main text. Results on lnVR are presented in the electronic  
109 supplementary material (SI Appendix Fig. S5.1 and S5.2).

110 There was no consistent pattern in which sex has more variability (lnCVR) in the examined traits  
111 (left panel in Fig. 3A). Our meta-analytic results also did not support a consistent pattern of  
112 either higher male variability or higher female variability (see Fig. 3B, left panel: “All” indicates  
113 that across all traits and functional groups, there was no significant sex bias in variances; lnCVR  
114 = 0.005, 95% confidence interval, 95% CI = [-0.009 to 0.018]). However, there was high  
115 heterogeneity among traits ( $I^2 = 76.5\%$ , SI Appendix Table S6.4; see also SI Appendix Table S6.5),  
116 indicating sex differences in variability are trait-dependent, corroborating our general  
117 observation that variability in some traits was male-based but others female-biased (Fig. 3A).

118 As expected, specific functional trait groups showed significant sex-specific bias in variability  
119 (Fig. 3B). The variability among-traits within a functional group was lower than that of all the  
120 traits combined (SI Appendix Table S6.4). For example, males exhibited an 8.05% increase in CV  
121 relative to females for morphological traits (lnCVR = 0.077; CI = [0.041 to 0.113],  $I^2 = 67.3\%$ ), but  
122 CV was female-biased for immunological traits (6.59% higher in females, lnCVR = -0.068, CI = [-  
123 0.098 to 0.038],  $I^2 = 40.8\%$ ) and eye morphology (7.85% higher in females, lnCVR = -0.081, CI  
124 = [-0.147 to (- 0.016)],  $I^2 = 49.8\%$ ).

125 The pattern was similar for overall sexual dimorphism in mean trait values (here, a slight male  
126 bias is indicated by larger “turquoise” than “orange” areas; Fig. 3A, right and Fig. 3B, lnRR: “All”,  
127 lnRR = 0.012, CI = [-0.006 to 0.31]). Trait means (lnRR) were 7% larger for males (lnRR = 0.067;  
128 CI = [0.007 to 0.128]) in morphological traits and 15.3 % larger in males for metabolic traits

129 (lnRR = 0.142; CI = [0.036 to 0.248]). In contrast, females had 5.59 % [lnRR = 0.057, CI = [-0.107  
130 to (-0.007)] larger means than those of males for immunological traits. We note that these  
131 meta-analytic estimates were accompanied by very large between-trait heterogeneity values  
132 (morphology  $I^2 = 99.7\%$ , metabolism  $I^2 = 99.4\%$ , immunology  $I^2 = 96.2$ ; see SI Appendix Table  
133 S6.4), indicating that even within the same functional groups, the degree and direction of sex-  
134 bias in the mean was not consistent among traits.

135 [Figure 4 here]

136

## 137 **DISCUSSION**

138 We tested competing predictions from two hypotheses explaining why sex-biases in trait  
139 variability exist. Neither the 'greater male variability' hypothesis nor the 'estrus-mediated  
140 variability' hypothesis explain the observed patterns in sex-biased trait variation on their own.  
141 Therefore, our results add further empirical weight to calls that question the basis for the  
142 routine exclusion of one sex in biomedical research based on the estrus-mediated variability  
143 hypothesis (3, 5–7, 30). It is important to know that for each trait we estimated the mean effect  
144 size (i.e. lnCVR) over strains and locations. As such, our results may not necessarily apply to  
145 every group of mice, which may or may not result in stronger support for either of the two  
146 hypotheses.

### 147 **Greater male variability vs. estrus-mediated variability?**

148 Evolutionary biologists commonly expect greater variability in the heterogametic sex than the  
149 homogametic sex. In mammals, males are heterogametic, and hence are expected to exhibit  
150 higher trait variability compared to females, which is also consistent with an expectation from  
151 sexual selection theory (20). Our results provide only partial support for the greater male  
152 variability hypothesis, because the expected pattern only manifested for morphological traits  
153 (see Fig. 3 & 4). This result corroborates a previous analysis across animals, which found that  
154 the heterogametic sex was more variable in body size (20). However, our data do not support  
155 the conclusion that higher variability in males occurs across all traits, including for many other  
156 morphological traits.

157 [Figure 4]

158 The estrus-mediated variability hypothesis was, at least until recently (6, 13), regularly used as  
159 a rationale for including only male subjects in many biomedical studies. So far, we know very  
160 little about the relationship between hormonal fluctuations and general trait variability within  
161 and among female subjects. Our results are consistent with the estrus-mediated variability  
162 hypothesis for immunological traits only. Immune responses can strongly depend on sex  
163 hormones (35, 36), which may explain higher female variability in these traits. However, if  
164 estrus status affects traits through variation in hormone levels, we would expect to also find

165 higher female variability in physiological and hematological traits. This was not the case in our  
166 dataset. Interestingly, however, eye morphology (structural traits, which should fluctuate little  
167 across the estrous cycle) also appeared to be more variable in females than males, but little is  
168 known about sex differences in ocular traits in general (37, 38). Overall, we find no consistent  
169 support for the female estrus-mediated variability hypothesis.

170 In line with our findings, recent studies have refuted the prediction of higher female variability  
171 (6, 13, 19, 30, 31). For example, several rodent studies have found that males are more variable  
172 than females (6, 13, 30, 31, 39, 40). Further studies should investigate whether higher female  
173 variability in immunological traits is indeed due to the estrous cycle, or generally because of  
174 greater between-individual variation (cf. Fig. 2).

175 In general, we found many traits to be sexually dimorphic (Fig. 4) in accordance with the  
176 previous study, which used the same database (4). Although the original study also provided  
177 estimates for sex differences in traits both with and without controlling for weight (we did not  
178 control for weight; cf. , 41). More specifically, males are larger than females, while females have  
179 higher immunological parameters (see Fig. 4). Notably, most sexually dimorphic trait means  
180 also show the greatest differences in trait variance (Fig. 3 & Fig. 4). Indeed, theory predicts that  
181 sexually selected traits (e.g., larger body size for males due to male-male competition) are likely  
182 more variable, as these traits are often condition dependent (24). Therefore, this sex difference  
183 in variability could be more pronounced under natural conditions compared to laboratory  
184 settings. This relationship may explain why male-biased morphological traits are larger and  
185 more variable.

## 186 **Eco-evolutionary implications**

187 We have used  $\ln\text{CVR}$  values to compare phenotypic variability (CV) between the sexes. When  
188  $\ln\text{CVR}$  is used for fitness-related traits, it can signify sex differences in the ‘opportunity for  
189 selection’ between females and males (24). If we assume that phenotypic variation (i.e.  
190 variability in traits) has a heritable basis, then large ratios of  $\ln\text{CVR}$  may indicate differences in  
191 the evolutionary potential of each sex to respond to selection, at least in the short term (42).  
192 We note, however, that in our study,  $\ln\text{CVR}$  reflects sex differences in trait variability within  
193 strains, such that the variability differences we observe between the sexes may be partially  
194 the result of phenotypic plasticity.

195 Demographic parameters, such as age-dependent mortality rate (43), are often different for  
196 each sex. Indeed, recognition of this fact has resulted in population dynamic models taking  
197 these widely observed sex-differences into account (44, 45). For example, a study on European  
198 sparrowhawks found that variability in mortality was higher in females compared to males (46).  
199 In this species, sex-specific variation affects age-dependent mortality and results in higher  
200 female life expectancy. As such, explicitly modelling sex difference in trait variability could lead  
201 to different conclusions compared to traditional modelling approaches.

202

### 203 **Statistical and practical implications**

204 It is now mandatory to include both sexes in biomedical experiments and clinical trials funded  
205 by the NIH, unless there exists strong justification against the inclusion of both sexes (18, 47).  
206 In order to conduct meaningful research and make sound clinical recommendations for both  
207 male and female patients, it is necessary to understand not only how trait means, but also how  
208 trait variances differ between the sexes. If one sex is systematically more variable in a trait of  
209 interest than the other, then experiments should be designed to accommodate relative  
210 differences in statistical power between the sexes (which has not been considered before, see  
211 3, 5–7). For example, given a limited number of animal subjects in an experiment measuring  
212 immunological traits, a balanced sex ratio may not be optimal. Female immunological traits are  
213 generally more variable (i.e. higher CV and SD). If we assume that responses to an experimental  
214 treatment will be similar between the sexes for this functional trait group, we will require more  
215 females to achieve the same statistical power as for the males.

216 To help researchers adjust their sex-specific sample size to achieve optimal statistical power,  
217 we provide an online tool (ShinyApp; <https://bit.ly/sex-difference>). This tool may serve as a  
218 starting point for checking baseline variability for each sex in mice. The sex bias (indicated by  
219 the % difference between the sexes) is provided for separate traits, procedures, and functional  
220 groups. These meta-analytic results are based on our analyses of more than 2 million rodent  
221 data points, from 26,916 individual mice. We note that, however, variability in a trait measured  
222 in untreated individuals maintained under carefully standardized environmental conditions, as  
223 reported here, may not directly translate into the same variability when measured in  
224 experimentally treated individuals, or individuals exposed to a range of environments (i.e.  
225 natural populations or human cohorts). Further, these estimates are overall mean differences  
226 across strains and locations. Therefore, these may not be particularly informative if one's  
227 experiment only includes one specific strain. However, we point out that our estimates may be  
228 useful in the light of a recent recommendation of using 'heterogenization' where different  
229 strains are mixed to increase the robustness of experimental results (48). Also, even in the case  
230 of using a particular strain, our tool can provide potentially useful benchmarks.

231 Importantly, when two groups (e.g., males and females) show differences in variability, we  
232 violate homogeneity of variance or homoscedasticity assumptions. Such a violation is  
233 detrimental because it leads to a higher Type I error rate. Therefore, we should consider  
234 incorporating heteroscedasticity (different variances) explicitly or using robust estimators of  
235 variance (also known as 'the sandwich variance estimator') to prevent an inflated Type I error  
236 rate (49), especially when we compare traits between the sexes.

### 237 **Conclusion**



238 We have shown that sex biases in variability occur in many mouse traits, but that the directions  
239 of those biases differ between traits. Neither the ‘greater male variability’ nor the ‘estrus-  
240 mediated variability’ hypothesis provides a general explanation for sex-differences in trait  
241 variability. Instead, we have found that the direction of the sex bias varies across traits and  
242 among trait types (Fig. 3 & 4). Our findings have important ecological and evolutionary  
243 ramifications. If the differences in variability correspond to the potential of each sex to respond  
244 to changes in specific environments, this sex difference needs to be incorporated into  
245 demographic and population-genetic modelling. Moreover, in the (bio-)medical field, our  
246 results should inform decisions during study design by providing more rigorous power analyses  
247 that allow researchers to incorporate sex-specific differences for sample size. We believe that  
248 taking sex-differences in trait variability into account will help avoid misleading conclusions and  
249 provide new insights into sex differences across many areas of biological and bio-medical  
250 research. Ultimately, such considerations will not only better our knowledge, but also close the  
251 current gaps in our biased knowledge (50).

## 252 **METHODS**

### 253 *Data selection and process*

254 The IMPC (International Mouse Phenotyping Consortium) provides a comprehensive catalogue  
255 of mammalian gene function for investigating the genetics of health and disease, by  
256 systematically collecting phenotypes of knock-out and wild type mice. To investigate  
257 differences in trait variability between the sexes, we only considered the data for wild-type  
258 control mice. We retrieved the dataset from the IMPC server in June 2018 and filtered it to  
259 contain non-categorical traits for wildtype mice. The initial dataset comprised over 2,500,000  
260 data points for 340 traits. In cases where multiple measurements were taken over time, data  
261 cleaning started with selecting single measurements for each individual and trait. In these cases,  
262 we selected the measurement closest to “100 days of age”. All data are from unstaged females  
263 (with no information about the stage of their estrous cycle). We excluded data for juvenile and  
264 unsexed mice (SI Appendix Fig. S1.1 A; this data set and scripts can be found on  
265 <https://bit.ly/code-mice-sex-diff>; raw data: <https://doi.org/10.5281/zenodo.3759701>).

### 266 *Grouping and effect size calculation*

267 We created a grouping variable called “population” (SI Appendix Fig. S1.1 B). A population  
268 comprised a group of individuals belonging to a distinct wild-type strain maintained at one  
269 particular location (institution); populations were identified for every trait of interest. Our data  
270 were derived from 11 different locations/institutions, and a given location/institution could  
271 provide data on multiple populations (see SI Appendix Table S6.1 for details on numbers of  
272 strains and institutions). We included only populations that contained data points for at least 6  
273 individuals, and which had information for members of both sexes; further, these populations  
274 for a particular trait had to come from at least two institutions to be eligible for inclusion. After

275 this selection process, the dataset contained 2,300,000 data points across 232 traits. Overall,  
276 we meta-analysed traits with between 2–18 effect sizes (mean = 9.09 effects, SD = 4.47).  
277 However, each meta-analysis contained a total number of individual mice that ranged from  
278 83/91 to 13467/13449 (males/females). While a minimum of N = 6 mice were used to create  
279 effect sizes for any given group (male or female), in reality samples sizes of male / female groups  
280 were much larger (males: mean = 396.66 (SD = 238.23), median = 465.56; females: mean =  
281 407.35 (SD = 240.31), median = 543.89). We used the function *escalc* in the R package, *metafor*  
282 (51) to obtain lnCVR, lnVR and lnRR and their corresponding sampling variance for each trait for  
283 each population; we worked in the R environment for data cleaning, processing and analyses  
284 (52, version 3.6.0; for the versions of all the software packages used for this article and all the  
285 details and code for the statistical analyses, see the electronic supplements). As mentioned  
286 above, the use of ratio-based effect sizes, such as lnCVR, lnVR and lnRR, controls for baseline  
287 changes over time and space, assuming that these changes affect males and females similarly.  
288 However, we acknowledge that we could not test this assumption.

### 289 ***Meta-analyses: overview***

290 We conducted meta-analyses at two different levels (SI Appendix Fig. S1.1 C-J). First, we  
291 conducted a meta-analysis for each trait for all three effect size types (lnRR, lnVR and lnCVR),  
292 calculated at the ‘population’ level (i.e. using population as a unit of analysis). Second, we  
293 statistically amalgamated overall effect sizes estimated at each trait (i.e. overall trait means as  
294 a unit of analysis) after accounting for dependence among traits. In other words, we conducted  
295 second-order meta-analyses (53). We used the second-order meta-analyses for three different  
296 purposes: A) estimating overall sex biases in variance (lnCVR and lnVR) and mean (lnRR) in the  
297 nine functional groups (for details, see below) and in all these groups combined (the overall  
298 estimates); B) visualizing heterogeneities across populations for the three types of effect size in  
299 the nine functional trait groups, which complemented the first set of analyses (SI Appendix Fig.  
300 S1.1 I, Table S6.6); and C) when traits were found to be significantly sex-biased, grouping such  
301 traits into either male-biased and female-biased traits, and then, estimating overall magnitudes  
302 of sex bias for both sexes again for the nine functional trait groups. Only the first second-order  
303 meta-analysis (A) directly related to the testing of our hypotheses, results of B and C are found  
304 in the supplemental tables and Figures, and reported in our freely accessible code.

### 305 ***Meta-analyses: population as an analysis unit***

306 To obtain degree of sex bias for each trait mean and variance (SI Appendix Fig. S1.1 C), we used  
307 the function *rma.mv* in the R package *metafor* (51) by fitting the following multilevel meta-  
308 analytic model, an extension of random-effects models (sensu 54):

$$309 \quad ES_i \sim 1 + (1 | \text{Strain}_j) + (1 | \text{Location}_k) + (1 | \text{Unit}_l) + \text{Error}_i,$$

310 where ‘ $ES_i$ ’ is the  $i$ th effect size (i.e. lnCVR, lnVR and lnRR) for each of 232 traits, the ‘1’ is the  
311 overall intercept (other ‘1’s are random intercepts for the following random effects), ‘Strain $_j$ ’ is

312 a random effect for the  $j$ th strain of mice (among 9 strains), 'Location $_k$ ' is a random effect for  
313 the  $k$ th location (among 11 institutions), 'Unit $_i$ ' is a residual (or effect-size level or 'population-  
314 level' random effect) for the  $i$ th effect size, 'Error $_i$ ' is a random effect of the known sampling  
315 error for the  $i$ th effect size. Given the model above, meta-analytic results had two components:  
316 1) overall means with standard errors (95% confidence intervals), and 2) total heterogeneity  
317 (the sum of the three variance components, which is estimated for the random effects). Note  
318 that overall means indicate average (marginalised) effect sizes over different strains and  
319 locations and total heterogeneities reflect variation around overall means due to different  
320 strains and locations.

321 We excluded traits which did not carry useful information for this study (i.e. fixed traits, such as  
322 number of vertebrae, digits, ribs and other traits that were not variable across wildtype mice;  
323 note that this may be different for knock-down mutant strains) or where the meta-analytic  
324 model for the trait of interest did not converge, most likely due to small sample size from the  
325 dataset (14 traits, see SI Appendix, for details: Meta-analyses; 1. Population as analysis unit).  
326 We therefore obtained a dataset containing meta-analytic results for 218 traits at this stage, to  
327 use for our second-order meta-analyses (SI Appendix Fig. S1.1 D).

### 328 ***Meta-analyses: accounting for correlated traits***

329 Our dataset of meta-analytic results included a large number of non-independent traits. To  
330 account for dependence, we identified 90 out of 218 traits, and organized them into 19 trait  
331 sub-groups (containing 2-10 correlated traits, see SI Appendix Fig. S1.1 E). For example, many  
332 measurements (i.e. traits) from hematological and immunological assays were hierarchically  
333 clustered or overlapped with each other (e.g., cell type A, B and A+B). We combined the meta-  
334 analytic results from 90 traits into 19 meta-analytic results (Fig. 3F) using the function *robu* in  
335 the R package, *robumeta* with the assumption of sampling errors being correlated with the  
336 default value of  $r = 0.8$  (55). Consequently, our final dataset for secondary meta-analyses  
337 contained 147 traits (i.e. the newly condensed 19 plus the remaining 128 independent traits,  
338 see SI Appendix Fig 1.1 , Table S6.2), which we assume to be independent of each other.

339

### 340 ***Second-order meta-analyses: trait as an analysis unit***

341 We created our nine overarching functional groups of traits (SI Appendix Fig. S1.1 G) by  
342 condensing the IMPC's 26 procedural categories ("procedures") into related clusters. The  
343 categories were based on procedures that were biologically related, in conjunction with  
344 measurement techniques and number available traits in each category (see SI Appendix Table  
345 S6.3 for a list of clustered traits, procedures and grouping terms). To test our two hypotheses  
346 about how trait variability changes in relation to sex, we estimated overall effect sizes for nine  
347 functional groups by aggregating meta-analytic results via a 'classical' random-effect models  
348 using the function *rma.uni* in the R package *metafor* (51). In other words, we conducted three

349 sets of 10 second-order meta-analyses (i.e. meta-analyzing 3 types of effect size: InRR, InVR and  
350 InCVR for 9 functional groups and one for all the groups combined, SI Appendix Fig. S1.1 H).  
351 Although we present the frequencies of male- and female-biased traits in Figure 3A, we did not  
352 run inferential statistical tests on these counts because such tests would be considered as vote-  
353 counting, which has been severely criticised in the meta-analytic literature (56).

## 354 **Author contributions**

355 SN conceived the initial idea, and all contributed to furthering the idea and the design of the  
356 study. SRKZ, along with FZ, led the analyses and writing with inputs from all authors. DWAN  
357 created the Shiny application. Apart from SRKZ, FZ, DWAN and SN, all authors have contributed  
358 equally, yet uniquely, and are listed in alphabetical order.

359 SRKZ, ML and SN were all supported by the Australian (ARC) Discovery Grant (DP180100818).  
360 JM was supported by EMBL core funding and the NIH Common Fund (UM1-H G006370). AMS  
361 was supported by an ARC fellowship (DE180101520).

## 362 **REFERENCES**

- 363 1. C. Darwin, *The Descent of Man, and Selection in Relation to Sex* (John Murray, 1871).
- 364 2. J. A. Clayton, Studying both sexes: a guiding principle for biomedicine. *FASEB J.* **30**, 519–524  
365 (2015).
- 366 3. K. L. Flanagan, Sexual dimorphism in biomedical research: a call to analyse by sex. *Trans R*  
367 *Soc Trop Med Hyg* **108**, 385–7 (2014).
- 368 4. N. A. Karp, *et al.*, Prevalence of sexual dimorphism in mammalian phenotypic traits. *Nat.*  
369 *Commun.* **8**, 15475 (2017).
- 370 5. S. L. Klein, *et al.*, Opinion: Sex inclusion in basic research drives discovery. *Proc. Natl. Acad.*  
371 *Sci.* **112**, 5257–5258 (2015).
- 372 6. B. J. Prendergast, K. G. Onishi, I. Zucker, Female mice liberated for inclusion in neuroscience  
373 and biomedical research. *Neurosci Biobehav Rev* **40**, 1–5 (2014).
- 374 7. R. M. Shansky, C. S. Woolley, Considering sex as a biological variable will be valuable for  
375 neuroscience research. *J. Neurosci.* **36**, 11817–11822 (2016).
- 376 8. A. Nowogrodzki, Inequality in medicine. *Nature* **550**, S18–S19 (2017).
- 377 9. I. Zucker, B. J. Prendergast, Sex differences in pharmacokinetics predict adverse drug  
378 reactions in women. *Biol. Sex Differ.* **11**, 32 (2020).
- 379 10. D. M. Dorris, J. Y. Cao, J. A. Willett, C. A. Hauser, J. Meitzen, Intrinsic excitability varies by  
380 sex in prepubertal striatal medium spiny neurons. *J. Neurophysiol.* **113**, 720–729 (2015).

- 381 11. C. Ingvorsen, N. A. Karp, C. J. Lelliott, The role of sex and body weight on the metabolic  
382 effects of high-fat diet in C57BL/6N mice. *Nutr. Amp Diabetes* **7**, e261 (2017).
- 383 12. C. M. Robinson, Y. Wang, J. K. Pfeiffer, Sex-dependent intestinal replication of an enteric  
384 virus. *J. Virol.* **91** (2017).
- 385 13. B. L. Smarr, A. D. Grant, I. Zucker, B. J. Prendergast, L. J. Kriegsfeld, Sex differences in  
386 variability across timescales in BALB/c mice. *Biol. Sex Differ.* **8** (2017).
- 387 14. A. A. Ahmad, M. D. Randall, R. E. Roberts, Sex differences in the role of phospholipase A2-  
388 dependent arachidonic acid pathway in the perivascular adipose tissue function in pigs. *J.*  
389 *Physiol.* **595**, 6623–6634 (2017).
- 390 15. R. W. Foltin, S. M. Evans, Sex differences in the anorexigenic effects of dexfenfluramine and  
391 amphetamine in baboons. *Exp. Clin. Psychopharmacol.* **26**, 335–340 (2018).
- 392 16. L. P. Thompson, L. Chen, B. M. Polster, G. Pinkas, H. Song, Prenatal hypoxia impairs cardiac  
393 mitochondrial and ventricular function in guinea pig offspring in a sex-related manner. *Am.*  
394 *J. Physiol. Regul. Integr. Comp. Physiol.* **315**, R1232–R1241 (2018).
- 395 17. J. A. Clayton, F. S. Collins, Policy: NIH to balance sex in cell and animal studies. *Nature* **509**,  
396 282–3 (2014).
- 397 18. NIH, Consideration of sex as a biological variable in NIH-funded research. **Notice NOT-OD-**  
398 **15-102** (2015).
- 399 19. A. K. Beery, I. Zucker, Sex bias in neuroscience and biomedical research. *Neurosci. Biobehav.*  
400 *Rev.* **35**, 565–572 (2011).
- 401 20. K. Reinhold, L. Engqvist, The variability is in the sex chromosomes. *Evolution* **67**, 3662–8  
402 (2013).
- 403 21. A. Pomiankowski, A. P. Møller, A resolution of the lek paradox. *Proc. R. Soc. London Series*  
404 *B-Biol. Sci.* **260**, 21–29 (1995).
- 405 22. J. J. Cuervo, A. P. Møller, Phenotypic variation and fluctuating asymmetry in sexually  
406 dimorphic feather ornaments in relation to sex and mating system. *Biol. J. Linn. Soc.* **68**,  
407 505–529 (1999).
- 408 23. J. J. Cuervo, A. P. Møller, Components of phenotypic variation in avian ornamental and non-  
409 ornamental feathers. *Evol. Ecol.* **15**, 53–72 (2001).
- 410 24. L. Rowe, D. Houle, The lek paradox and the capture of genetic variance by condition  
411 dependent traits. *Proc. R. Soc. London Series B-Biol. Sci.* **263**, 1415–1421 (1996).
- 412 25. J. L. Tomkins, J. Radwan, J. S. Kotiaho, T. Tregenza, Genic capture and resolving the lek  
413 paradox. *Trends Ecol. Evol.* **19**, 323–328 (2004).

- 414 26. A.-C. Lehre, K. P. Lehre, P. Laake, N. C. Danbolt, Greater intrasex phenotype variability in  
415 males than in females is a fundamental aspect of the gender differences in humans. *Dev.*  
416 *Psychobiol.* **51**, 198–206 (2009).
- 417 27. W. Johnson, A. Carothers, I. J. Deary, Sex differences in variability in general intelligence: a  
418 new look at the old question. *Perspect. Psychol. Sci.* **3**, 518–531 (2008).
- 419 28. L. V. Hedges, A. Nowell, Sex differences in mental test scores, variability, and numbers of  
420 high-scoring individuals. *Science* **269**, 41–45 (1995).
- 421 29. Y. Itoh, A. P. Arnold, Are females more variable than males in gene expression? Meta-  
422 analysis of microarray datasets. *Biol. Sex Differ.* **6** (2015).
- 423 30. J. B. Becker, B. J. Prendergast, J. W. Liang, Female rats are not more variable than male rats:  
424 a meta-analysis of neuroscience studies. *Biol. Sex Differ.* **7**, 34 (2016).
- 425 31. A. K. Beery, Inclusion of females does not increase variability in rodent research studies.  
426 *Curr. Opin. Behav. Sci.* **23**, 143–149 (2018).
- 427 32. S. Nakagawa, *et al.*, Meta-analysis of variation: ecological and evolutionary applications and  
428 beyond. *Methods Ecol. Evol.* **6**, 143–152 (2015).
- 429 33. A. M. Senior, W. Viechtbauer, S. Nakagawa, Revisiting and expanding the meta-analysis of  
430 variation: The log coefficient of variation ratio. *Res Synth Methods*, e176 (2020).
- 431 34. M. E. Dickinson, *et al.*, High-throughput discovery of novel developmental phenotypes.  
432 *Nature* **537**, 508 (2016).
- 433 35. M. Zuk, K. A. McKean, Sex differences in parasite infections: Patterns and processes. *Int. J.*  
434 *Parasitol.* **26**, 1009–1024 (1996).
- 435 36. C. Grossman, Possible underlying mechanisms of sexual dimorphism in the immune  
436 response, fact and hypothesis. *J. Steroid Biochem.* **34**, 241–251 (1989).
- 437 37. H. Wagner, B. A. Fink, K. Zadnik, Sex- and gender-based differences in healthy and diseased  
438 eyes. *Optom. - J. Am. Optom. Assoc.* **79**, 636–652 (2008).
- 439 38. A. Shaqiri, *et al.*, Sex-related differences in vision are heterogeneous. *Sci. Rep.* **8** (2018).
- 440 39. A. Fritz, I. Amrein, D. P. Wolfer, Similar reliability and equivalent performance of female and  
441 male mice in the open field and water-maze place navigation task. *Am. J. Med. Genet. C*  
442 *Semin. Med. Genet.* **175**, 380–391 (2017).
- 443 40. J. S. Mogil, M. L. Chanda, The case for the inclusion of female subjects in basic science  
444 studies of pain. *Pain* **117**, 1–5 (2005).
- 445 41. S. Nakagawa, D. W. A. Noble, A. M. Senior, M. Lagisz, Meta-evaluation of meta-analysis: ten  
446 appraisal questions for biologists. *BMC Biol.* **15**, 18 (2017).

- 447 42. T. F. Hansen, D. Houle, Measuring and comparing evolvability and constraint in multivariate  
448 characters. *J. Evol. Biol.* **21**, 1201–1219 (2008).
- 449 43. J.-F. Lemaître, *et al.*, Sex differences in adult lifespan and aging rates of mortality across wild  
450 mammals. *Proc. Natl. Acad. Sci.* **117**, 8546–8553 (2020).
- 451 44. H. Caswell, D. E. Weeks, Two-Sex Models: Chaos, Extinction, and Other Dynamic  
452 Consequences of Sex. *Am. Nat.* **128**, 707–735 (1986).
- 453 45. J. Lindström, H. Kokko, Sexual reproduction and population dynamics: the role of polygyny  
454 and demographic sex differences. *Proc. R. Soc. Lond. B Biol. Sci.* **265**, 483–488 (1998).
- 455 46. F. Colchero, A. E. Aliaga, O. R. Jones, D. A. Conde, Individual heterogeneity determines sex  
456 differences in mortality in a monogamous bird with reversed sexual dimorphism. *J. Anim.  
457 Ecol.* **86**, 899–907 (2017).
- 458 47. NIH, Enhancing reproducibility through rigor and transparency. **Notice NOT-OD-15-103**  
459 (2015).
- 460 48. B. Voelkl, *et al.*, Reproducibility of animal research in light of biological variation. *Nat. Rev.  
461 Neurosci.* **21**, 384–393 (2020).
- 462 49. I. R. Cleasby, S. Nakagawa, Neglected biological patterns in the residuals. *Behav. Ecol.  
463 Sociobiol.* **65**, 2361–2372 (2011).
- 464 50. C. Tannenbaum, R. P. Ellis, F. Eyssel, J. Zou, L. Schiebinger, Sex and gender analysis improves  
465 science and engineering. *Nature* **575**, 137–146 (2019).
- 466 51. W. Viechtbauer, Conducting meta-analyses in R with the metafor package. *J Stat Softw* **36**  
467 (2010).
- 468 52. R Core Team, *R: A language and environment for statistical computing.* (2017).
- 469 53. S. Nakagawa, *et al.*, Research weaving: visualizing the future of research synthesis. *Trends  
470 Ecol. Evol.* **34**, 224–238 (2019).
- 471 54. S. Nakagawa, E. S. Santos, Methodological issues and advances in biological meta-analysis.  
472 *Evol. Ecol.* **26**, 1253–1274 (2012).
- 473 55. Z. Fisher, E. Tipton, H. Zhipeng, M. Z. Fisher, Package ‘robumeta’ (2017).
- 474 56. J. P. Higgins, *et al.*, *Cochrane handbook for systematic reviews of interventions* (John Wiley  
475 & Sons, 2019).
- 476

477 **Fig. 1.**

478 Overview of meta-analytic methods used to detect differences in means and variances in any  
 479 given trait (e.g., body size in mice). The orange shading represents females (F), turquoise  
 480 shading stands for males (M). The solid “dot” represents a mean trait value within the  
 481 respective group. Solid lines represent standard deviation, with upper and lower bounds  
 482 indicated by diamond shapes. Below, we present three types of effect sizes that can be used  
 483 for comparing two groups, along with the respective formulas and interpretations. Compared  
 484 to lnVR (the ratio of SD), lnCVR (the ratio of CV or relative variance) provides a more general  
 485 measure of the difference in variability between two groups (mean-adjusted variability ratio).

486

487

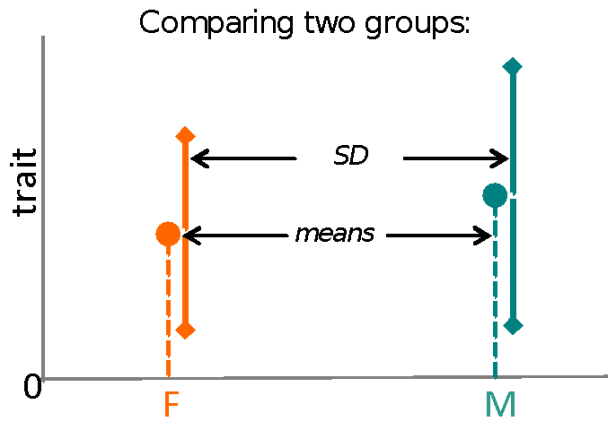

**Which group has larger mean value?**

Response Ratio:

$$\ln RR = \ln\left(\frac{\text{---} \bullet \text{---}}{\text{---} \bullet \text{---}}\right)$$

$\ln RR > 0$  □ □ male-biased mean trait values

**Which group is more variable?**

Variability Ratio:

$$\ln VR = \ln\left(\frac{\text{---} \blacklozenge \text{---}}{\text{---} \blacklozenge \text{---}}\right)$$

$\ln VR > 0$  □ □ traits more variable in males

**Which group is more variable when controlling for the means?**

Coefficient of Variation Ratio:

$$\ln CVR = \ln\left(\frac{\text{---} \blacklozenge \text{---} \bullet \text{---}}{\text{---} \blacklozenge \text{---} \bullet \text{---}}\right)$$

$\ln CVR > 0$  □ □ male-biased mean trait values



488 **Fig. 2.**

489 The two hypotheses (“Greater Male Variability” vs “Estrus-Mediated variability”) have different  
490 underlying predictions on how variabilities influence total observed phenotypic variance ( $V_{total}$   
491 in the figure). For Greater Male Variability, the within-subject (or within-trait) variation  $V_{within}$   
492 could be potentially negligible, or is equal in males and females. This is illustrated as the shaded  
493 distributions around each individual mean (dashed vertical lines), which are of equal area for  
494 the males (turquoise) and females (orange). The greater value of  $V_{total}$  is driven by wider  
495 distribution of mean trait values in males compared to females (i.e.  $V_{between}$ , represented by a  
496 thick horizontal bar). The estrus-mediated variability hypothesis, in contrast, assumes that  
497 within-subject [or within trait] variability is much higher in females than in males (broader  
498 orange-shaded trait distributions than blue-green distributions), while the variability of the  
499 means between individuals stays the same (thick horizontal bars).

500

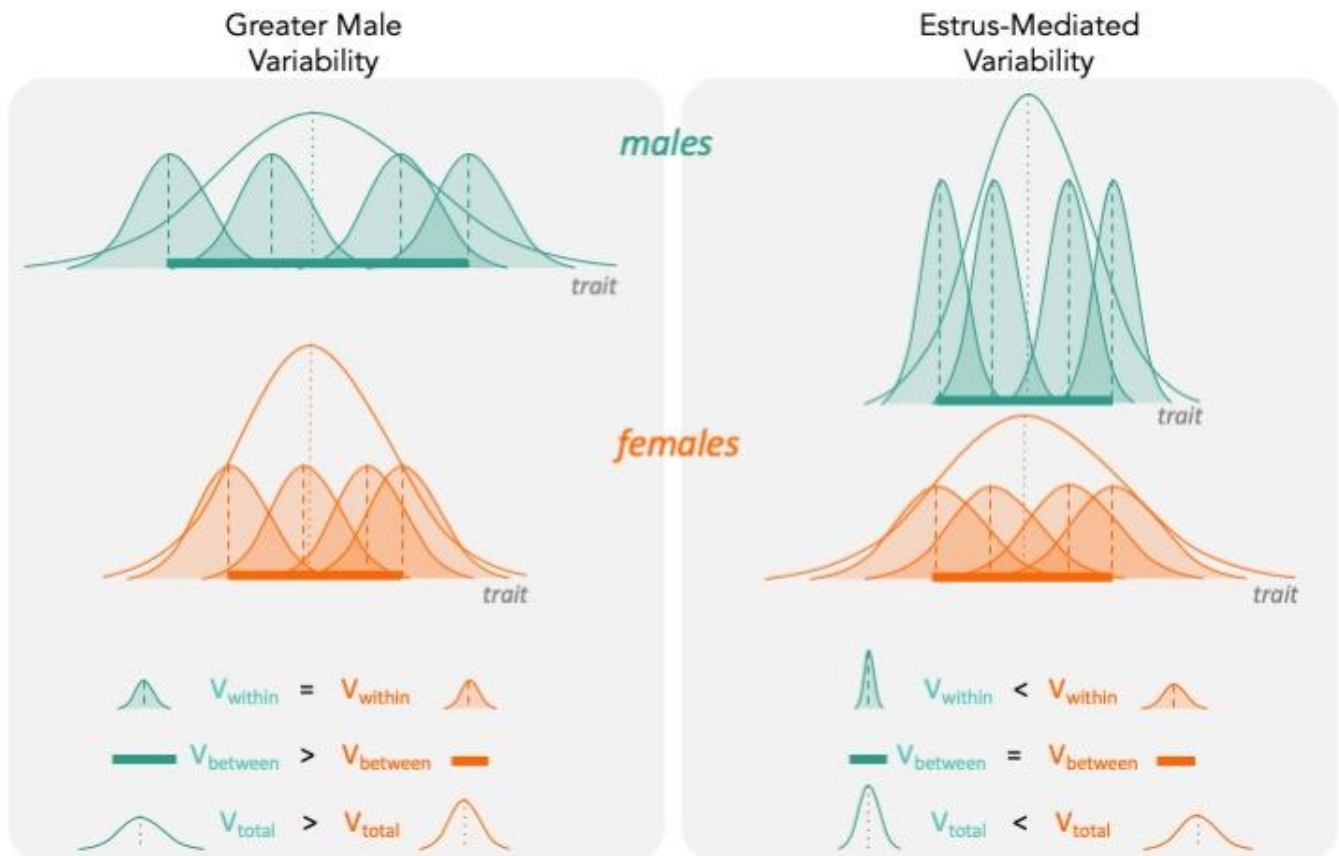

501

502

503 **Fig. 3:**

504 Panel A shows the numbers of traits across functional groups that are either male-biased  
 505 (turquoise) or female-biased (orange; as in SI Appendix Fig. S1.1 D). The x-axes in Panel A show  
 506 the overall percentages of traits, coloured shading is indicative of direction of sex-bias sex (if  
 507 meta-analytic means < 0, then they are female-based whereas if they are > 0, male-based).  
 508 White numbers in the turquoise bars represent numbers of traits that show male-bias within a  
 509 given group of traits, number in the orange area the number of female-biased traits. Panel B  
 510 shows effect sizes and 95% CI from separate meta-analysis for each functional group (SI  
 511 Appendix Fig. S1.1 H). Traits that are male biased in Panel B are shifted towards the righthand  
 512 side of the zero-midline (near the turquoise male symbol), whereas female bias is shifted  
 513 towards the left (near orange symbol).

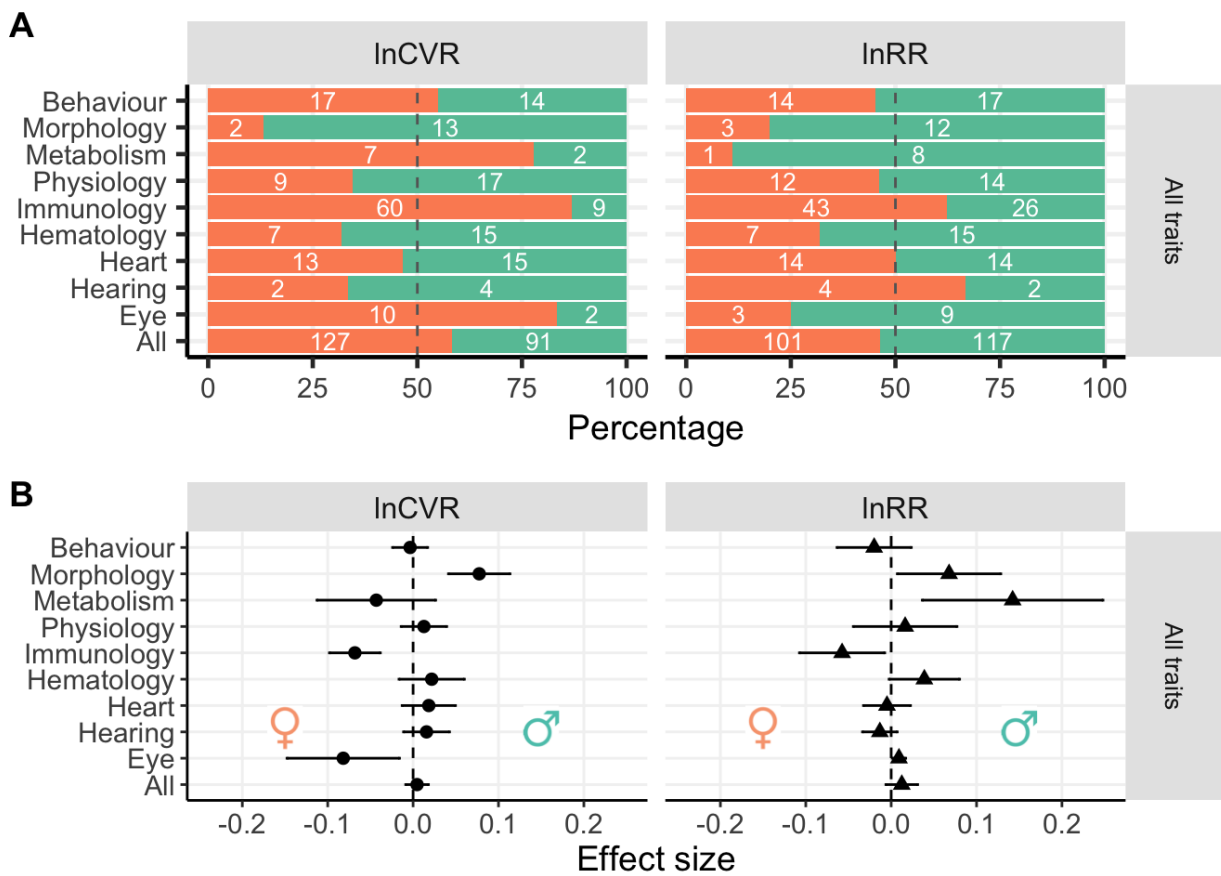

514

515 **Fig. 4.**

516 Summary of sex-differences in the mean trait values (lnRR) and variances (lnCVR) across nine  
517 functional trait groups, and overall.

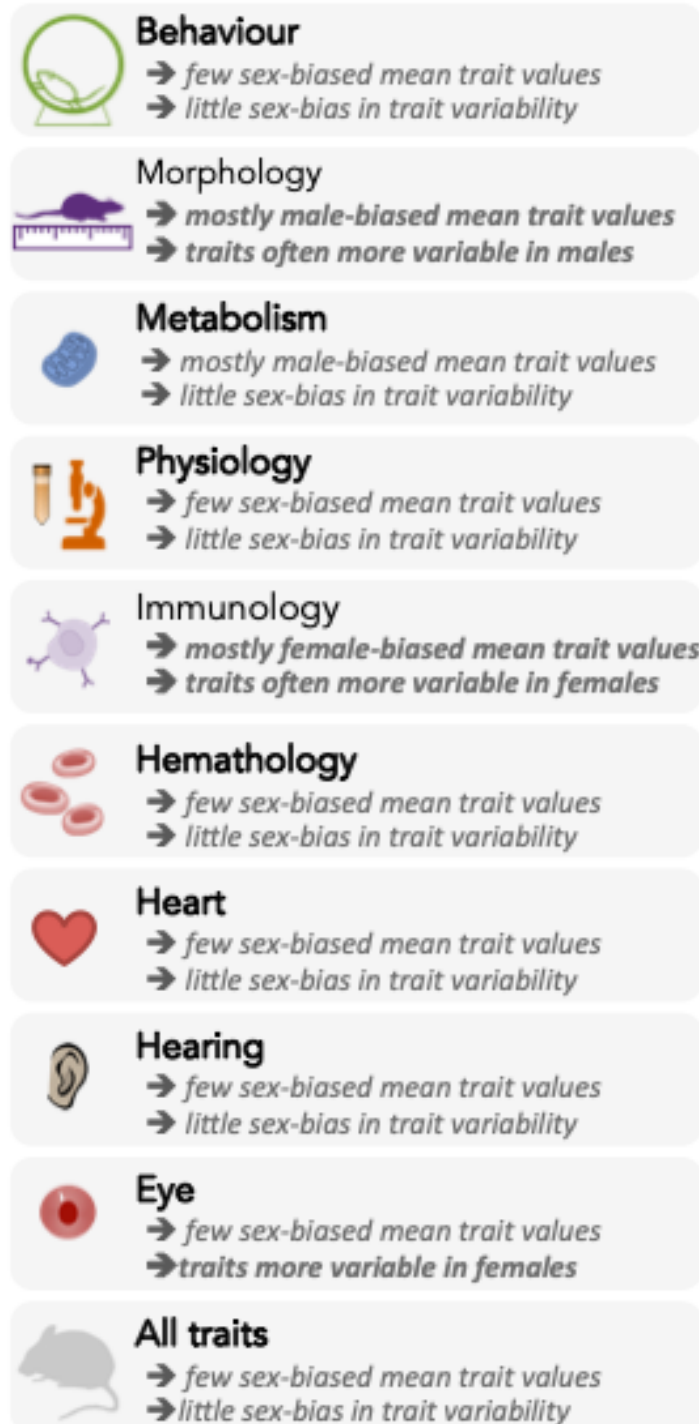

518
